# Supplementary material for: Leptogorgins A–C, Humulane Sesquiterpenoids from the Vietnamese Gorgonian Leptogorgia sp
Source: MDPI journal article supplement (doi:10.3390/md18060310), 2020-06-13

## Supplementary Materials

# Leptogorgins A-C, Humulane Sesquiterpenoids from the Vietnamese Gorgonian *Leptogorgia* sp.

Irina I. Kapustina<sup>1</sup>, Tatyana N. Makarieva<sup>1\*</sup>, Alla G. Guzii<sup>1</sup>, Anatoly I. Kalinovsky<sup>1</sup>, Roman S. Popov<sup>1</sup>, Sergey A. Dyshlovoy<sup>1,2,3</sup>, Boris B. Grebnev<sup>1</sup>, Gunhild von Amsberg<sup>2,3</sup>, Valentin A. Stonik<sup>1</sup>

<sup>1</sup> G.B. Elyakov Pacific Institute of Bioorganic Chemistry, Far Eastern Branch of the Russian Academy of Sciences, Pr. 100-let Vladivostoku 159, 690022 Vladivostok, Russia

ikapust@rambler.ru (I.I.K.); gagry@rambler.ru (A.G.G); kaaniv@pidoc.dvo.ru (A.I.K.); prs\_90@mail.ru (R.S.P.); dyshlovoy@gmail.com (S.A.D.); grebnev\_bor@mail.ru (G.B.B.), stonik@piboc.dvo.ru (V.A.S.)

<sup>2</sup> Department of Oncology, Hematology and Bone Marrow Transplantation with Section Pneumology, Hubertus Wald-Tumorzentrum, University Medical Center Hamburg-Eppendorf, 20251 Hamburg, Germany; g.von-amsberg@uke.de (G.v.A.)

<sup>3</sup> Martini-Klinik, Prostate Cancer Center, University Hospital Hamburg-Eppendorf, 20251 Hamburg, Germany (S.A.D.); (G.v.A.)

\* Correspondence: makarieva@piboc.dvo.ru (T.N.M.) Tel.: +7-950-295-66-25

## List

- Figure S1.** HRESIMS of leptogorgin A (**1**).  
**Figure S2.**  $^1\text{H}$ -NMR spectrum of leptogorgin A (**1**) in  $\text{CDCl}_3$ .  
**Figure S3.**  $^{13}\text{C}$ -NMR spectrum of leptogorgin A (**1**) in  $\text{CDCl}_3$ .  
**Figure S4.**  $^1\text{H}$ - $^1\text{H}$ -COSY spectrum of leptogorgin A (**1**) in  $\text{CDCl}_3$ .  
**Figure S5.** HSQC spectrum of leptogorgin A (**1**) in  $\text{CDCl}_3$ .  
**Figure S6.** HMBC spectrum of leptogorgin A (**1**) in  $\text{CDCl}_3$ .  
**Figure S7.** ROESY spectrum of leptogorgin A (**1**) in  $\text{CDCl}_3$ .  
**Table S1.**  $^1\text{H}$  NMR Data ( $\text{CDCl}_3$ ) for compounds **1a** and **1b**.  
**Figure S8.** HRESIMS of leptogorgin B (**2**).  
**Figure S9.**  $^1\text{H}$ -NMR spectrum of leptogorgin B (**2**) in  $\text{CDCl}_3$ .  
**Figure S10.**  $^{13}\text{C}$ -NMR spectrum of leptogorgin B (**2**) in  $\text{CDCl}_3$ .  
**Figure S11.**  $^1\text{H}$ - $^1\text{H}$ -COSY spectrum of leptogorgin B (**2**) in  $\text{CDCl}_3$ .  
**Figure S12.** HSQC spectrum of leptogorgin B (**2**) in  $\text{CDCl}_3$ .  
**Figure S13.** HMBC spectrum of leptogorgin B (**2**) in  $\text{CDCl}_3$ .  
**Figure S14.** ROESY spectrum of leptogorgin B (**2**) in  $\text{CDCl}_3$ .  
**Figure S15.** HRESIMS of leptogorgin C (**3**).  
**Figure S17.**  $^{13}\text{C}$ -NMR spectrum of leptogorgin C (**3**) in  $\text{CDCl}_3$ .  
**Figure S18.**  $^1\text{H}$ - $^1\text{H}$ -COSY spectrum of leptogorgin C (**3**) in  $\text{CDCl}_3$ .  
**Figure S19.** HSQC spectrum of leptogorgin C (**3**) in  $\text{CDCl}_3$ .  
**Figure S20.** HMBC spectrum of leptogorgin C (**3**) in  $\text{CDCl}_3$ .  
**Figure S21.** HRESIMS of leptogorgoid A (**4**).  
**Figure S22.**  $^1\text{H}$ -NMR spectrum of leptogorgoid A (**4**) in  $\text{CDCl}_3$ .  
**Figure S23.**  $^{13}\text{C}$ -NMR spectrum of leptogorgoid A (**4**) in  $\text{CDCl}_3$ .  
**Figure S24.**  $^1\text{H}$ - $^1\text{H}$ -COSY spectrum of leptogorgoid A (**4**) in  $\text{CDCl}_3$ .  
**Figure S25.** HSQC spectrum of leptogorgoid A (**4**) in  $\text{CDCl}_3$ .  
**Figure S26.** HMBC spectrum of leptogorgoid A (**4**) in  $\text{CDCl}_3$ .  
**Figure S27.** ECD spectra of leptogorgin A (**1**) and leptogorgin B (**2**).

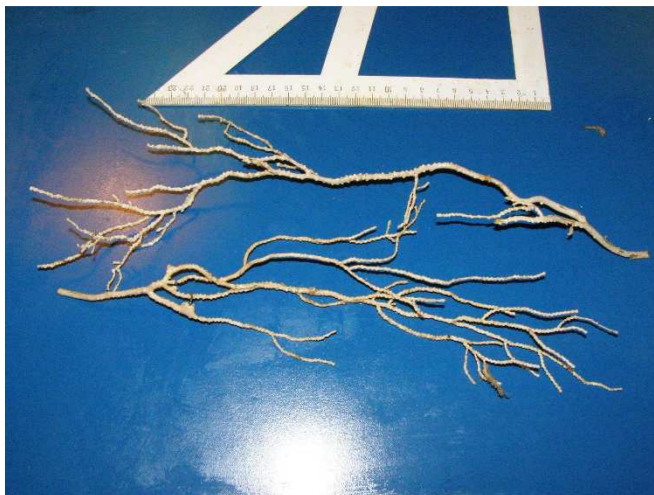

Foto of gorgonian *Leptogorgia* sp. (#038-011)

**Figure S1.** HRESIMS of leptogorgin A (**1**).

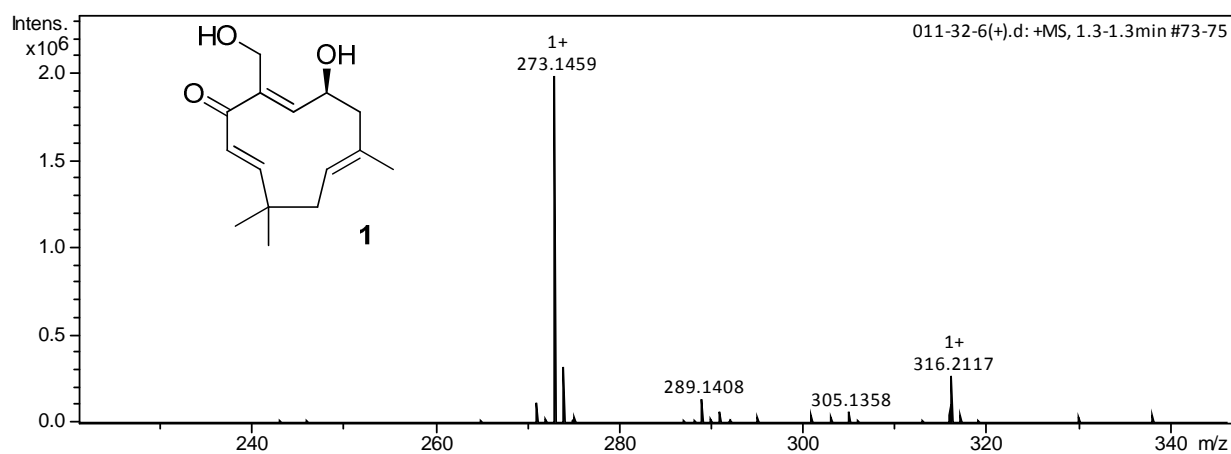

Figure S2.  $^1\text{H}$ -NMR spectrum of leptogorgin A (**1**) in  $\text{CDCl}_3$ .

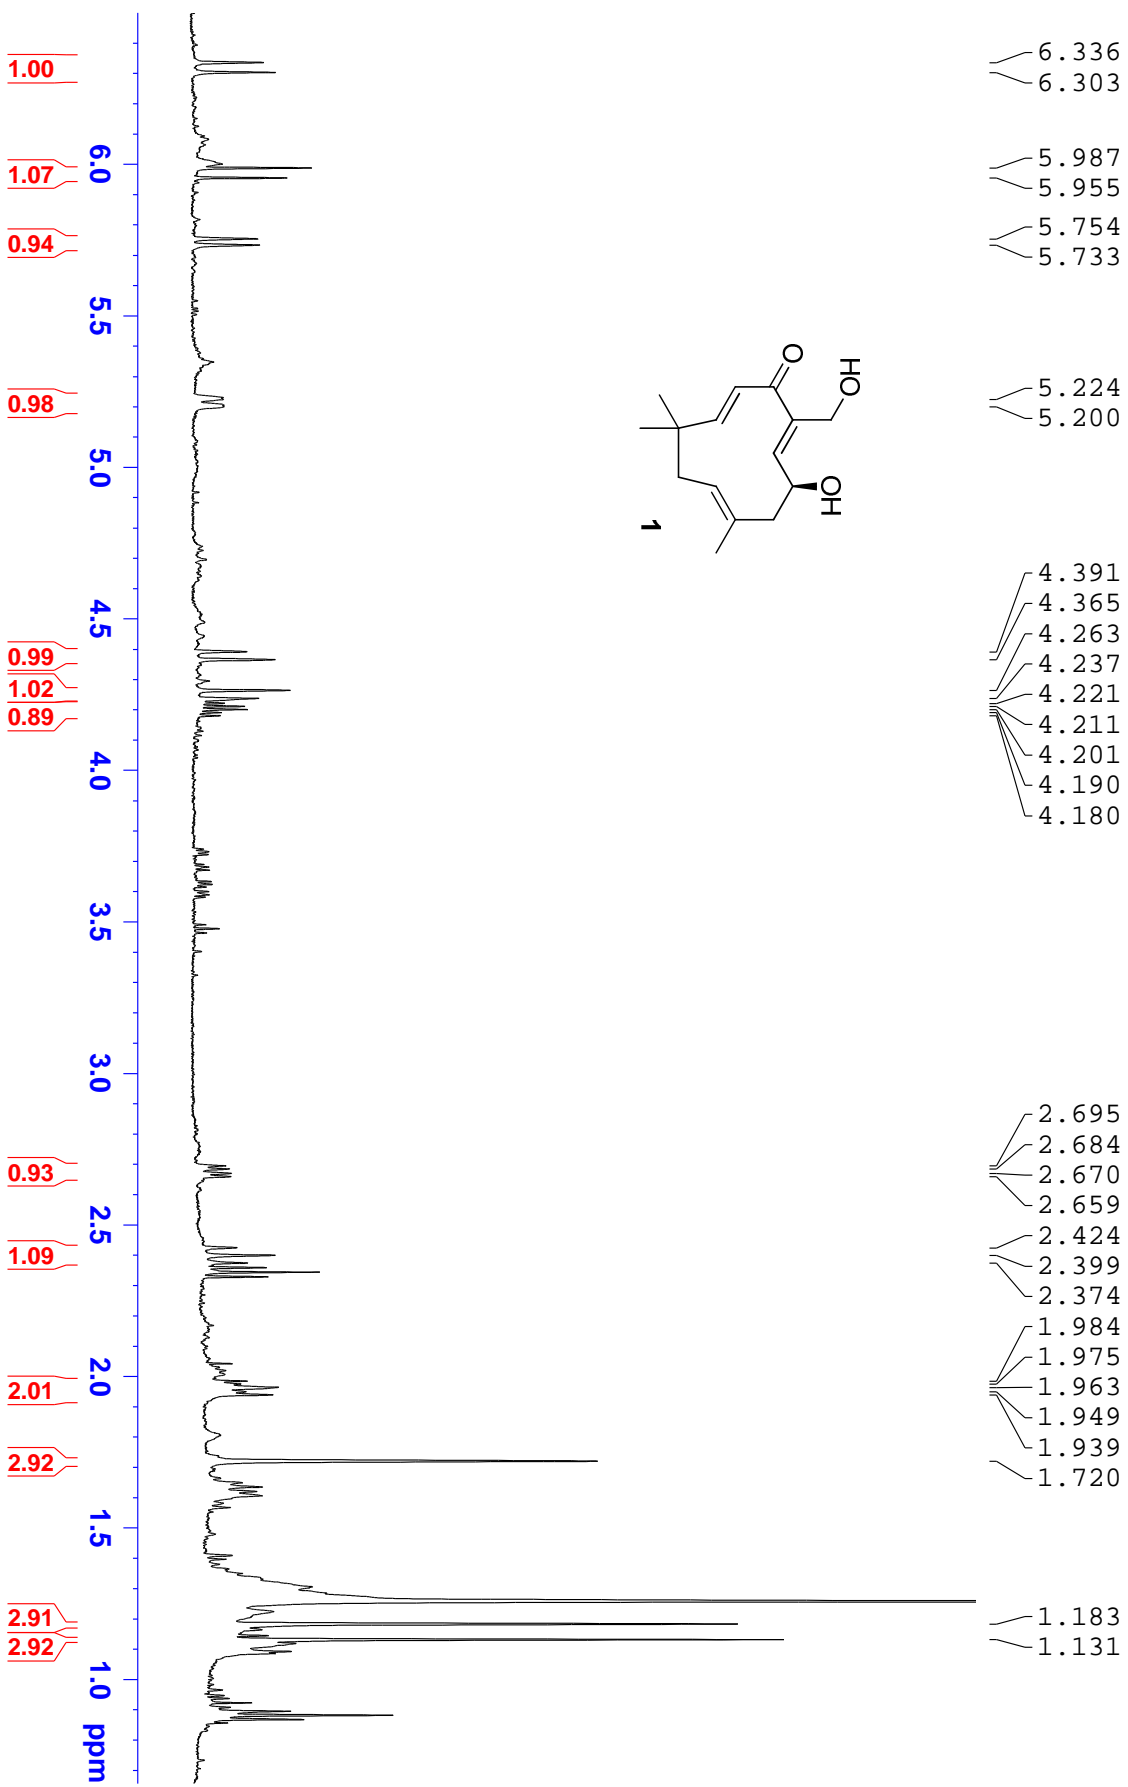

**Figure S3.**  $^{13}\text{C}$ -NMR spectrum of leptogorgin A (**1**) in  $\text{CDCl}_3$ .

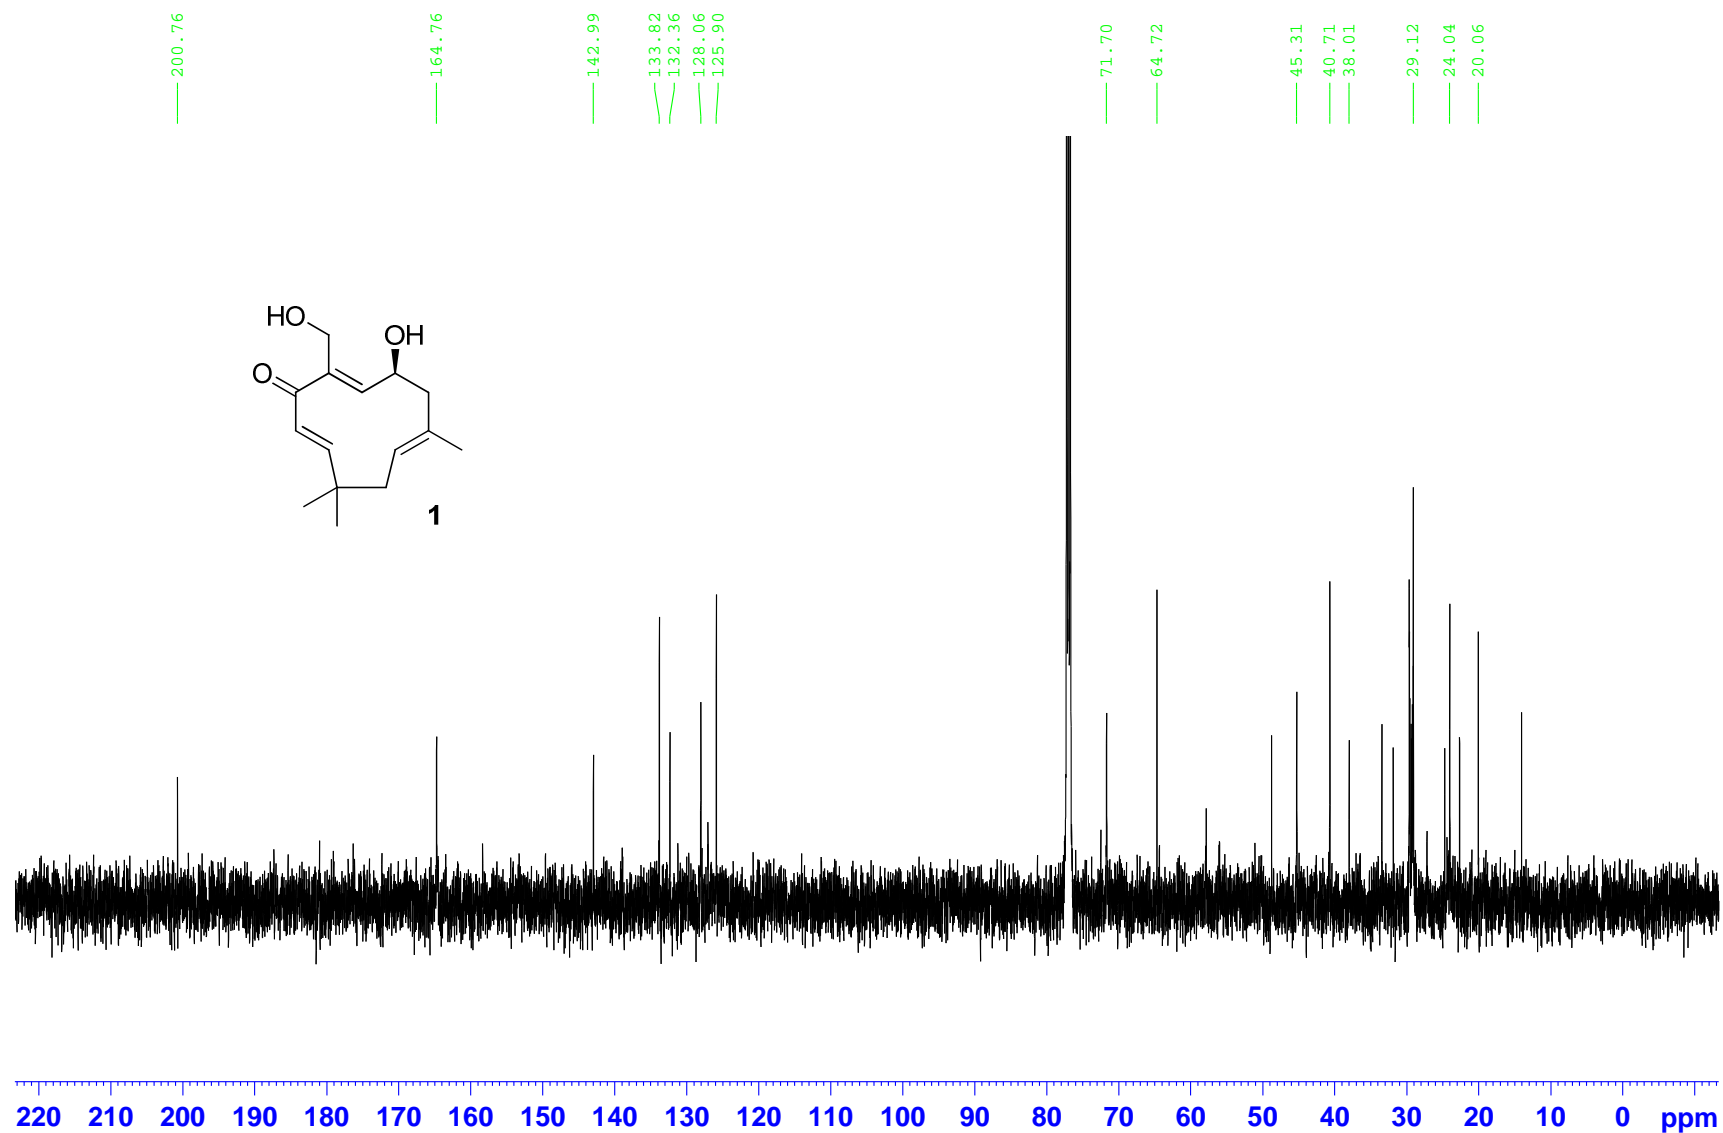

**Figure S4.**  $^1\text{H}$ - $^1\text{H}$ -COSY spectrum of leptogorgin A (**1**) in  $\text{CDCl}_3$ .

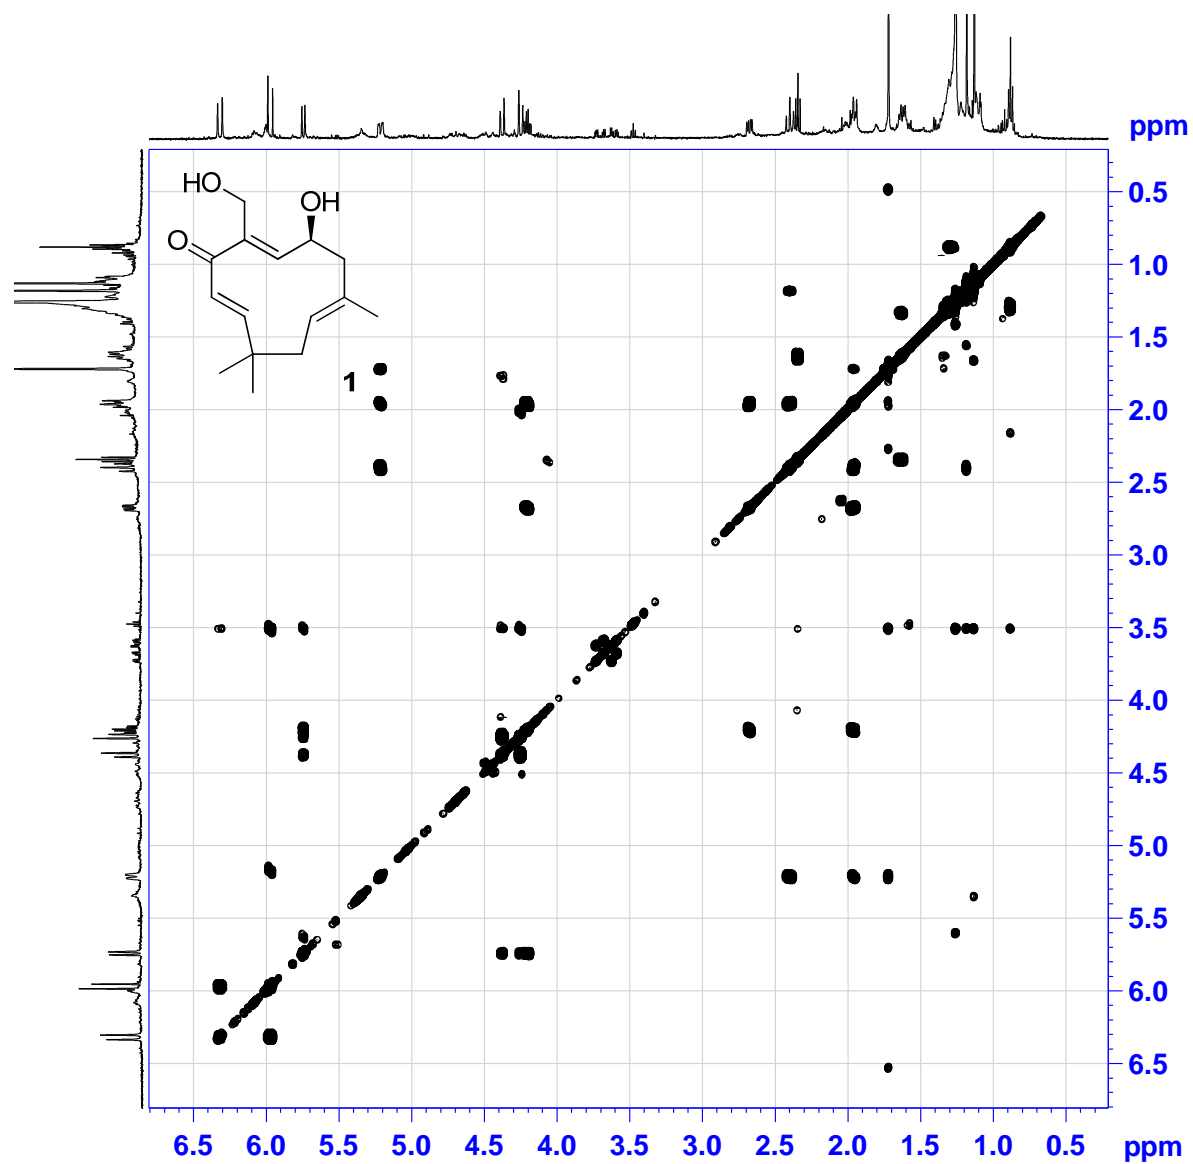

Figure S5. HSQC spectrum of leptogorgin A (1) in CDCl<sub>3</sub>.

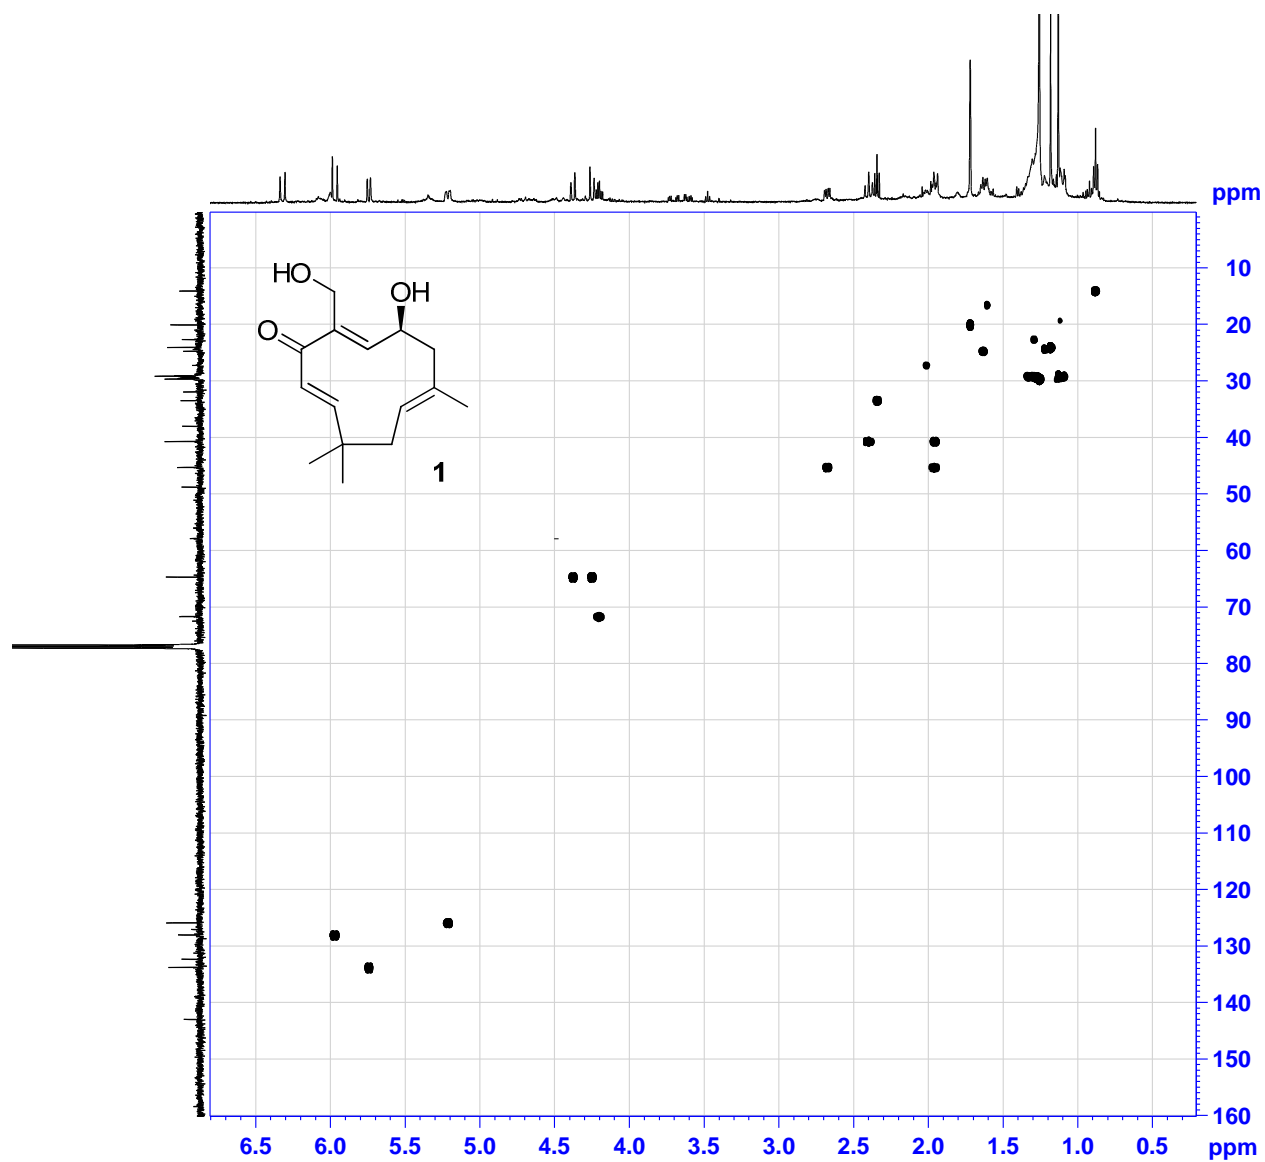

Figure S6. HMBC spectrum of leptogorgin A (**1**) in CDCl<sub>3</sub>.

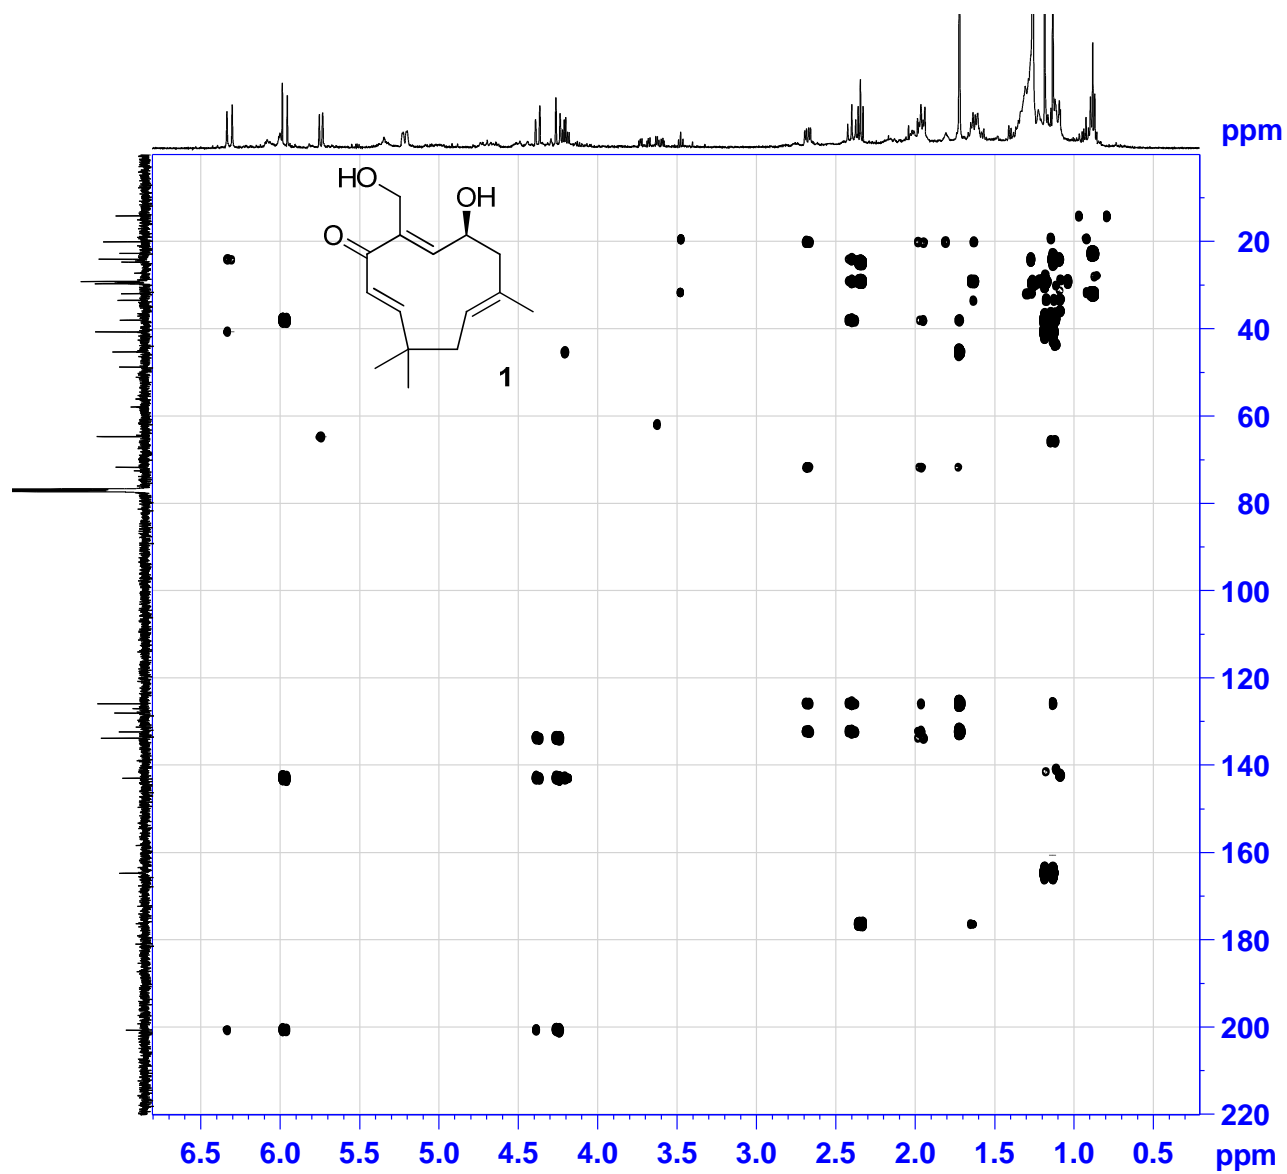



**Figure S7.** ROESY spectrum of leptogorgin A (**1**) in CDCl<sub>3</sub>.

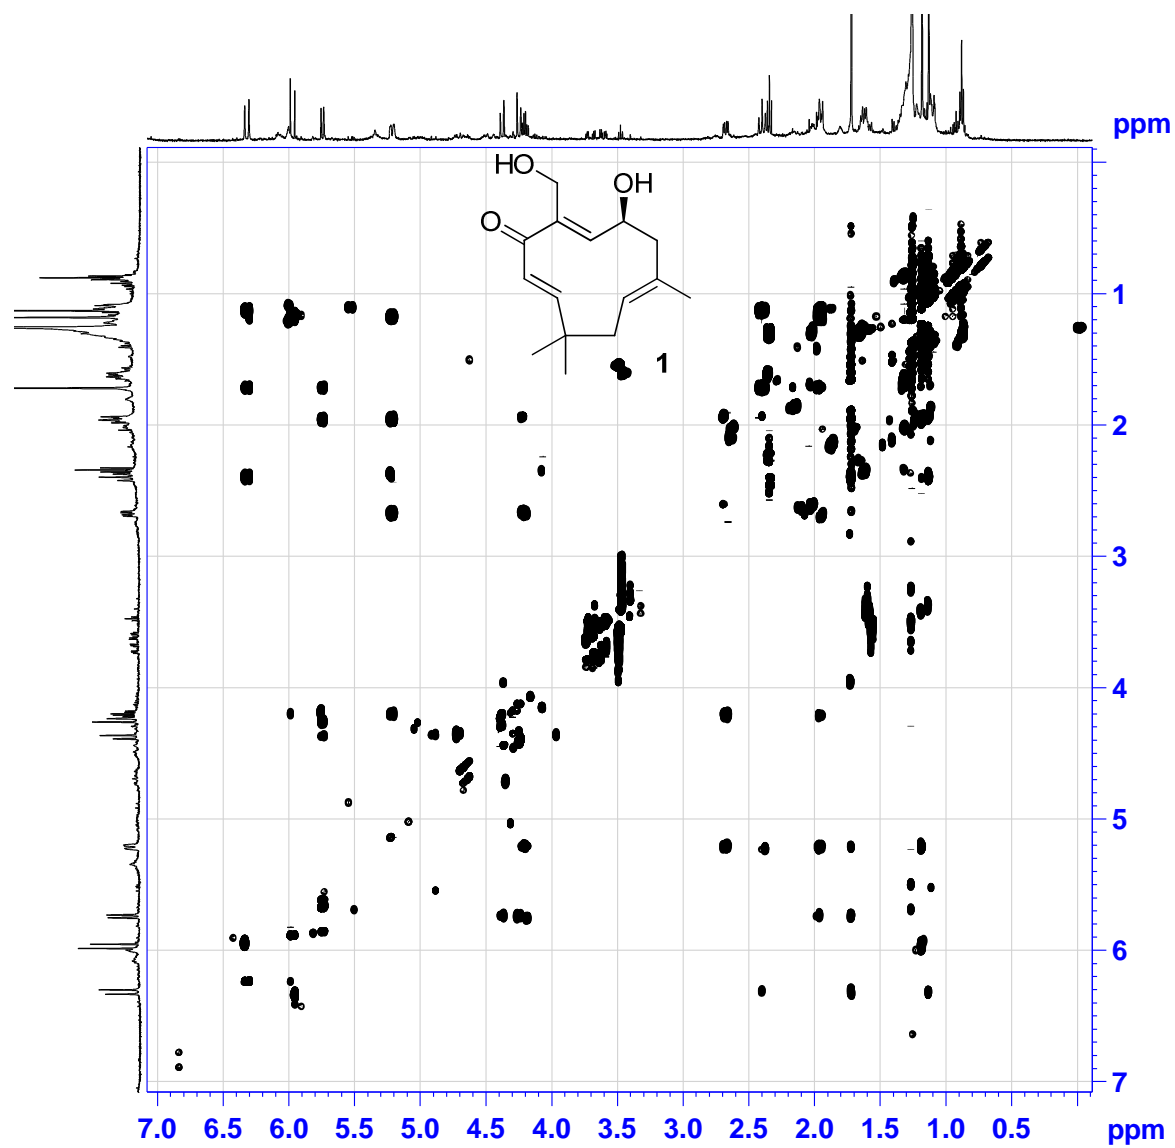

**Table S1.** <sup>1</sup>H NMR Data (CDCl<sub>3</sub>) for compounds **1a** and **1b**.

| position | <i>S</i> -Ester ( <b>1a</b> )             | <i>R</i> -Ester ( <b>1b</b> )             |
|----------|-------------------------------------------|-------------------------------------------|
|          | $\delta_{\text{Hmult}}$ ( <i>J</i> in Hz) | $\delta_{\text{Hmult}}$ ( <i>J</i> in Hz) |
| 2        | 6.18, d (16.3)                            | 6.37, d (16.3)                            |
| 3        | 6.07, d (16.3)                            | 6.24, d (16.3)                            |
| 6        | 5.75, d (10.6)                            | 5.71, d (10.6)                            |
| 7        | 5.47 td (10.6; 5.4)                       | 5.90, td (10.6; 5.4)                      |
| 8        | 1.96, m                                   | 2.54, m                                   |
|          | 2.70, dd (12.2; 5.4)                      | 2.71, dd (12.2; 5.4)                      |
| 10       | 5.32, m                                   | 5.36, m                                   |
| 11       | 1.91, m                                   | 1.96, m                                   |
|          | 2.28, t (12.5)                            | 2.38, t (12.5)                            |
| 12       | 4.76, d (13.3)                            | 4.72, d (13.3)                            |
|          | 5.16, d (13.3)                            | 5.15, d (13.3)                            |
| 13       | 1.74, s                                   | 1.75, s                                   |
| 14       | 1.18, s                                   | 1.32, s                                   |
| 15       | 0.97, s                                   | 1.01, s                                   |

**Figure S8.** HRESIMS of leptogorgin B (**2**).

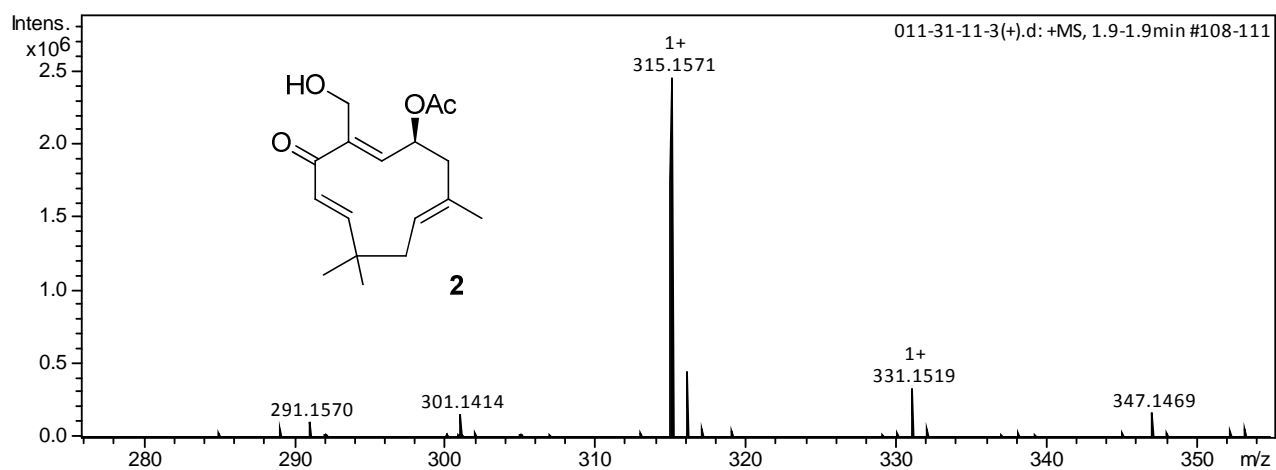

Figure S9.  $^1\text{H}$ -NMR spectrum of leptogorgin B (**2**) in  $\text{CDCl}_3$ .

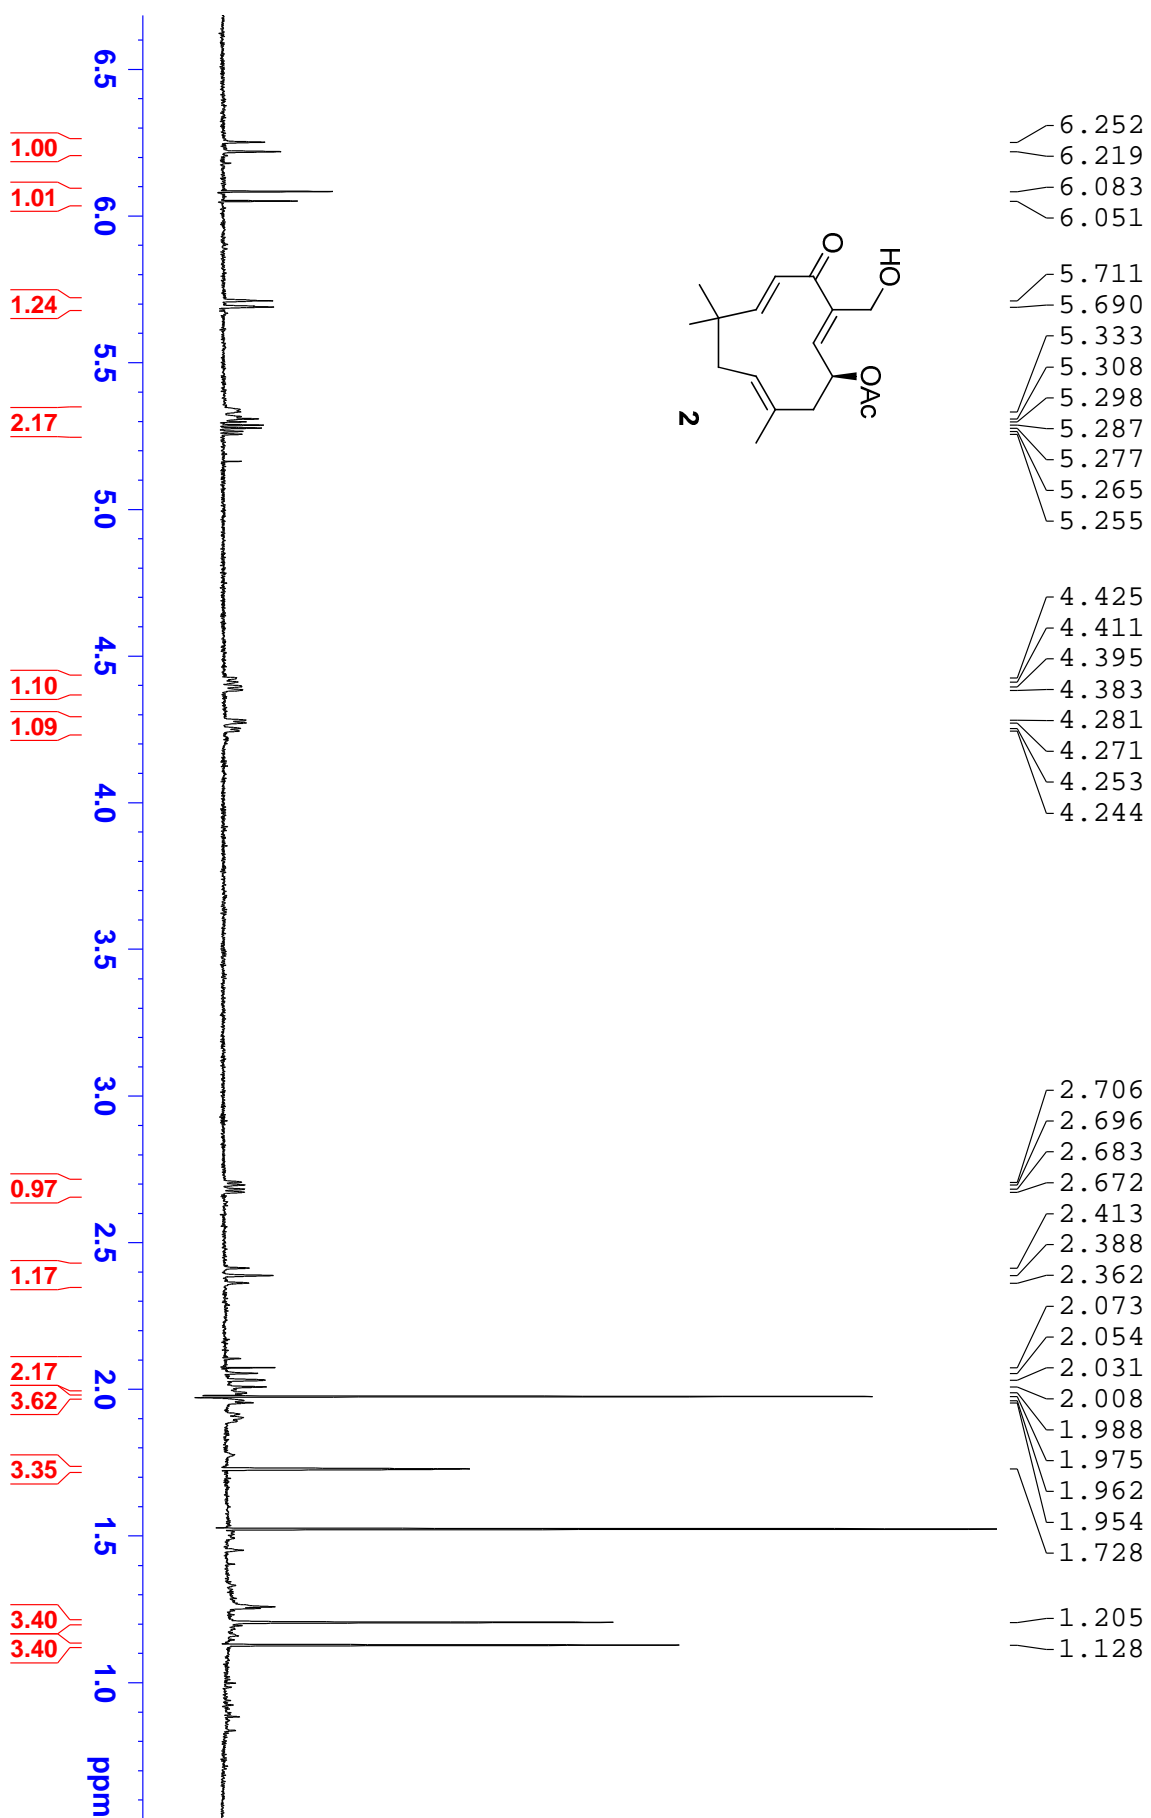

**Figure S10.**  $^{13}\text{C}$ -NMR spectrum of leptogorgin B (**2**) in  $\text{CDCl}_3$ .

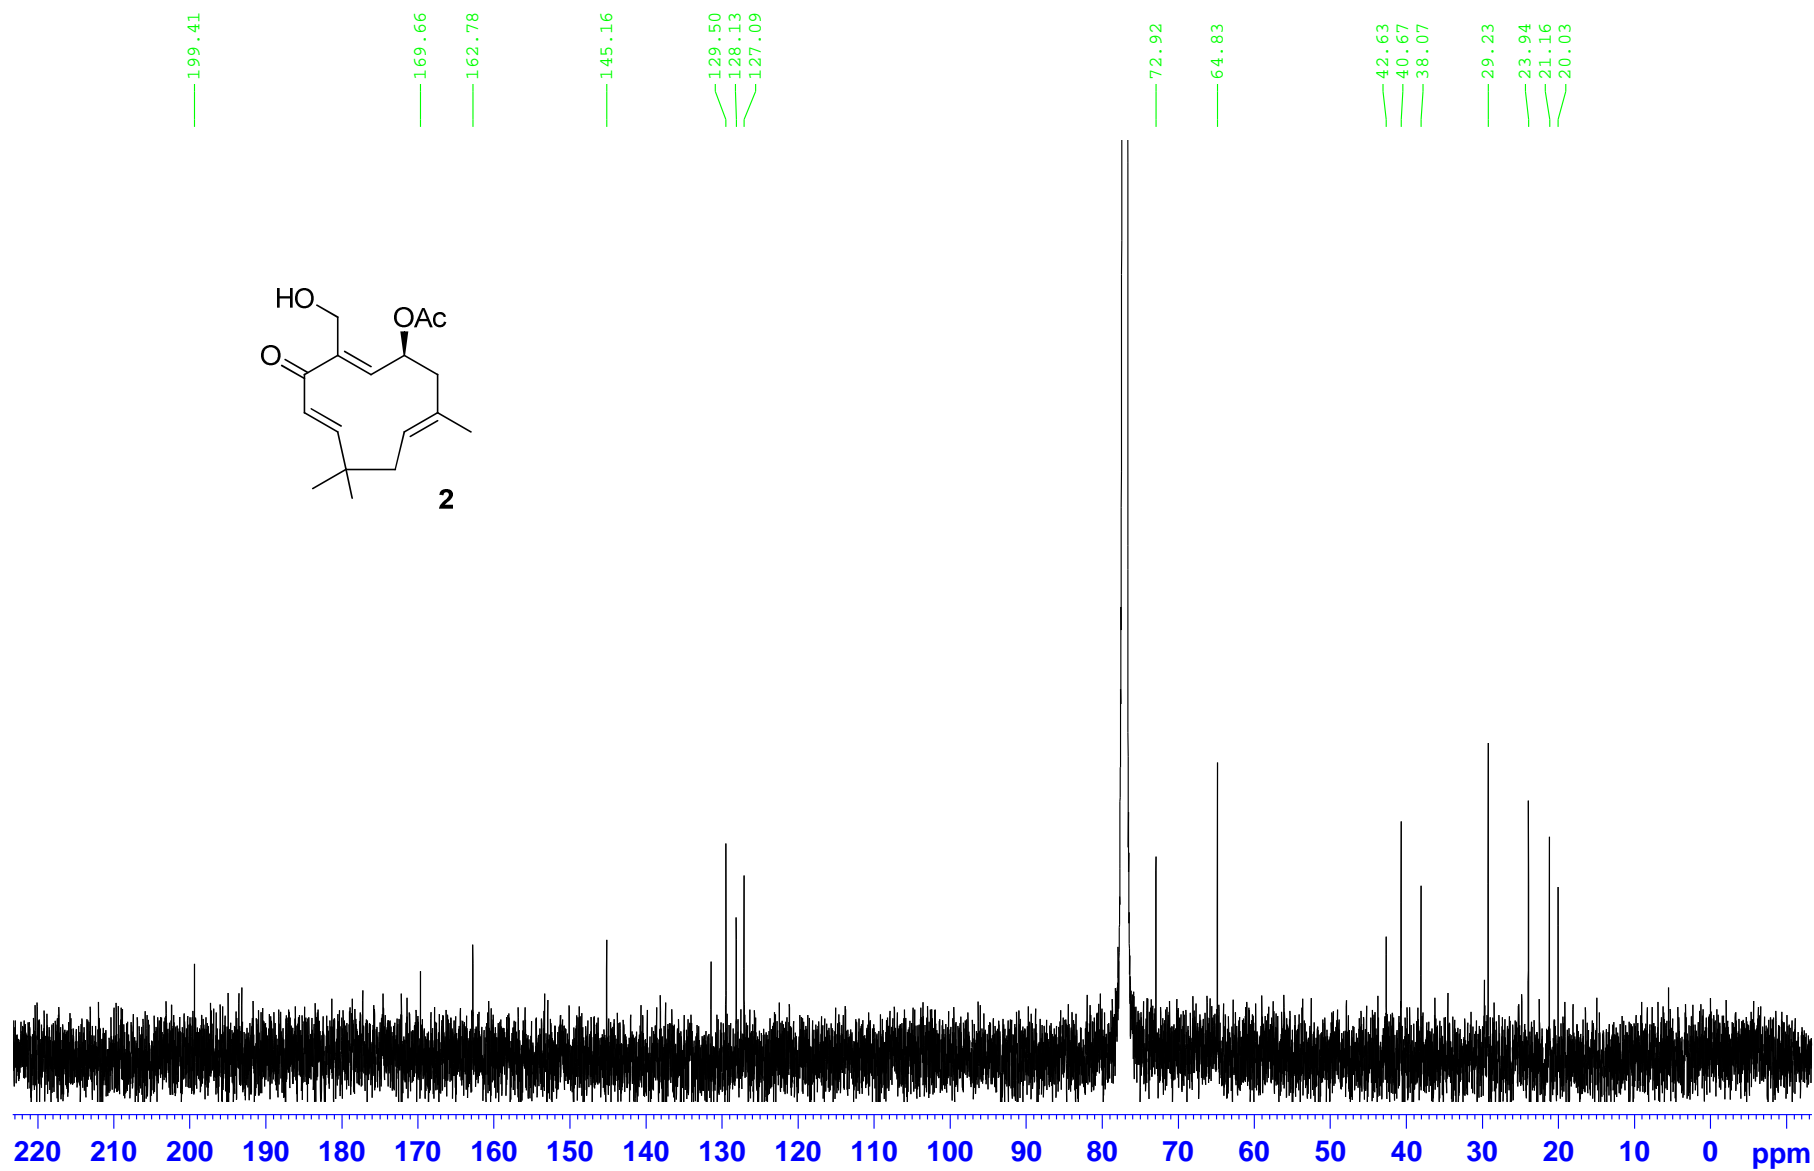

**Figure S11.**  $^1\text{H}$ - $^1\text{H}$ -COSY spectrum of leptogorgin B (**2**) in  $\text{CDCl}_3$ .

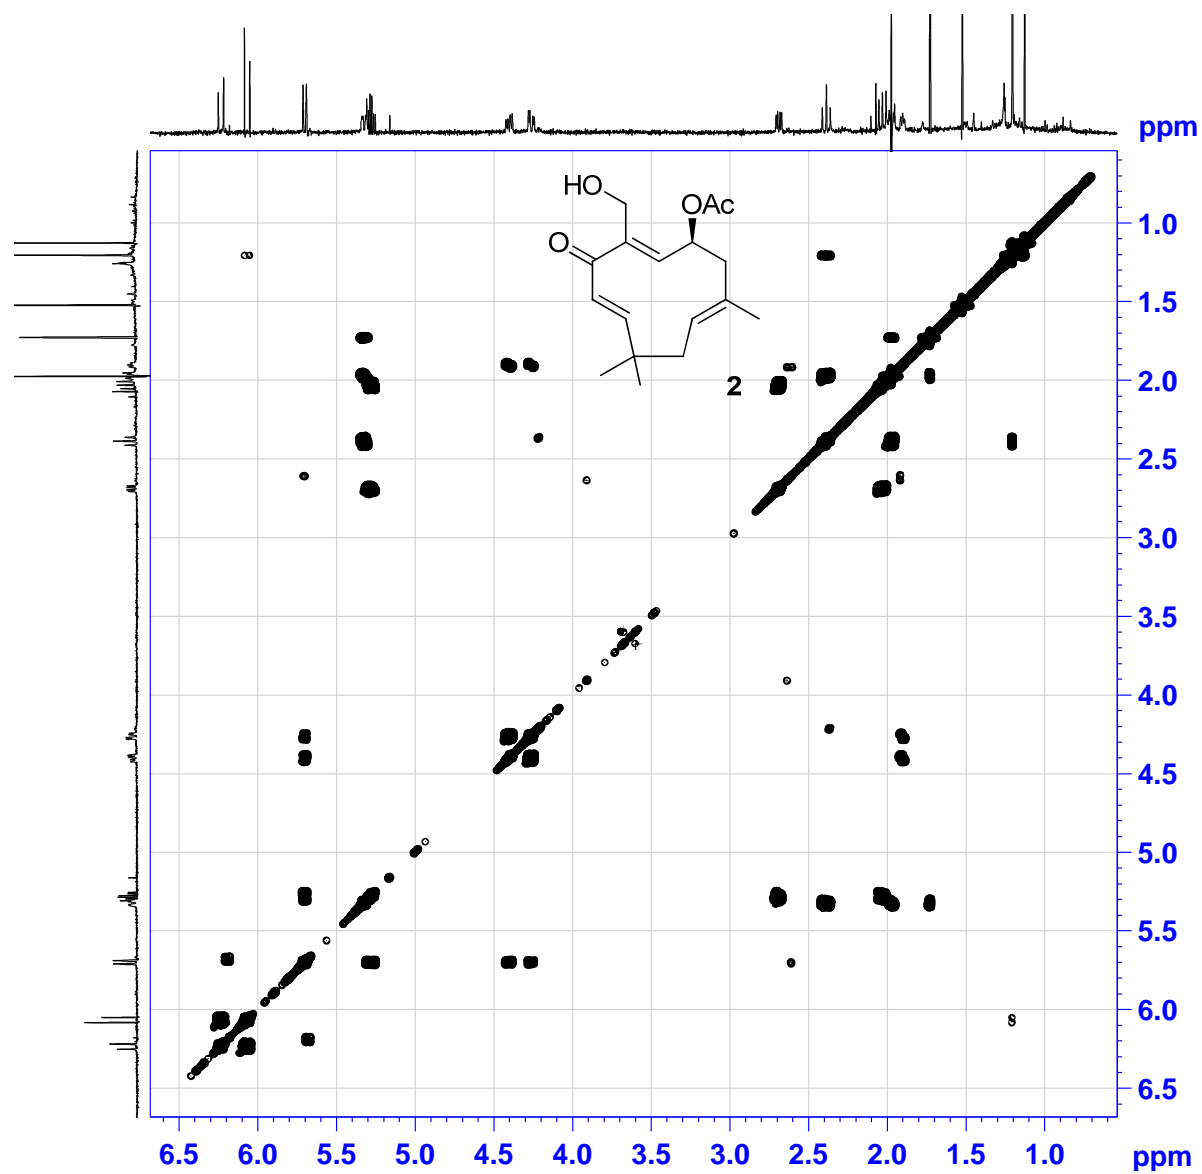

Figure S12. HSQC spectrum of leptogorin B (2) in CDCl<sub>3</sub>.

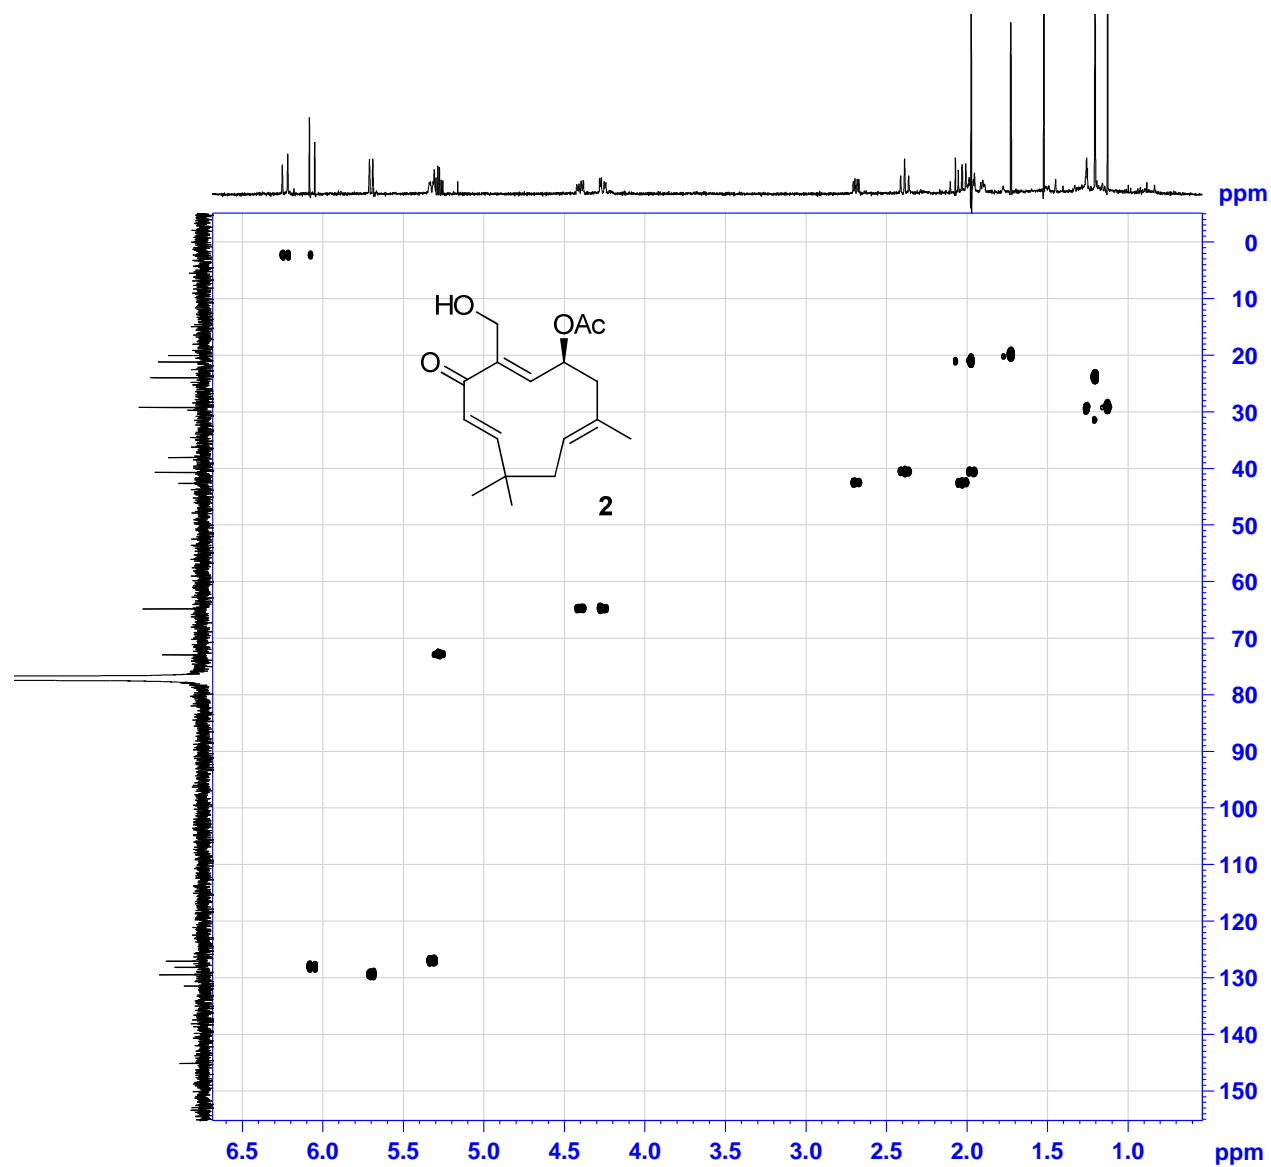

Figure S13. HMBC spectrum of leptogorgin B (2) in CDCl<sub>3</sub>.

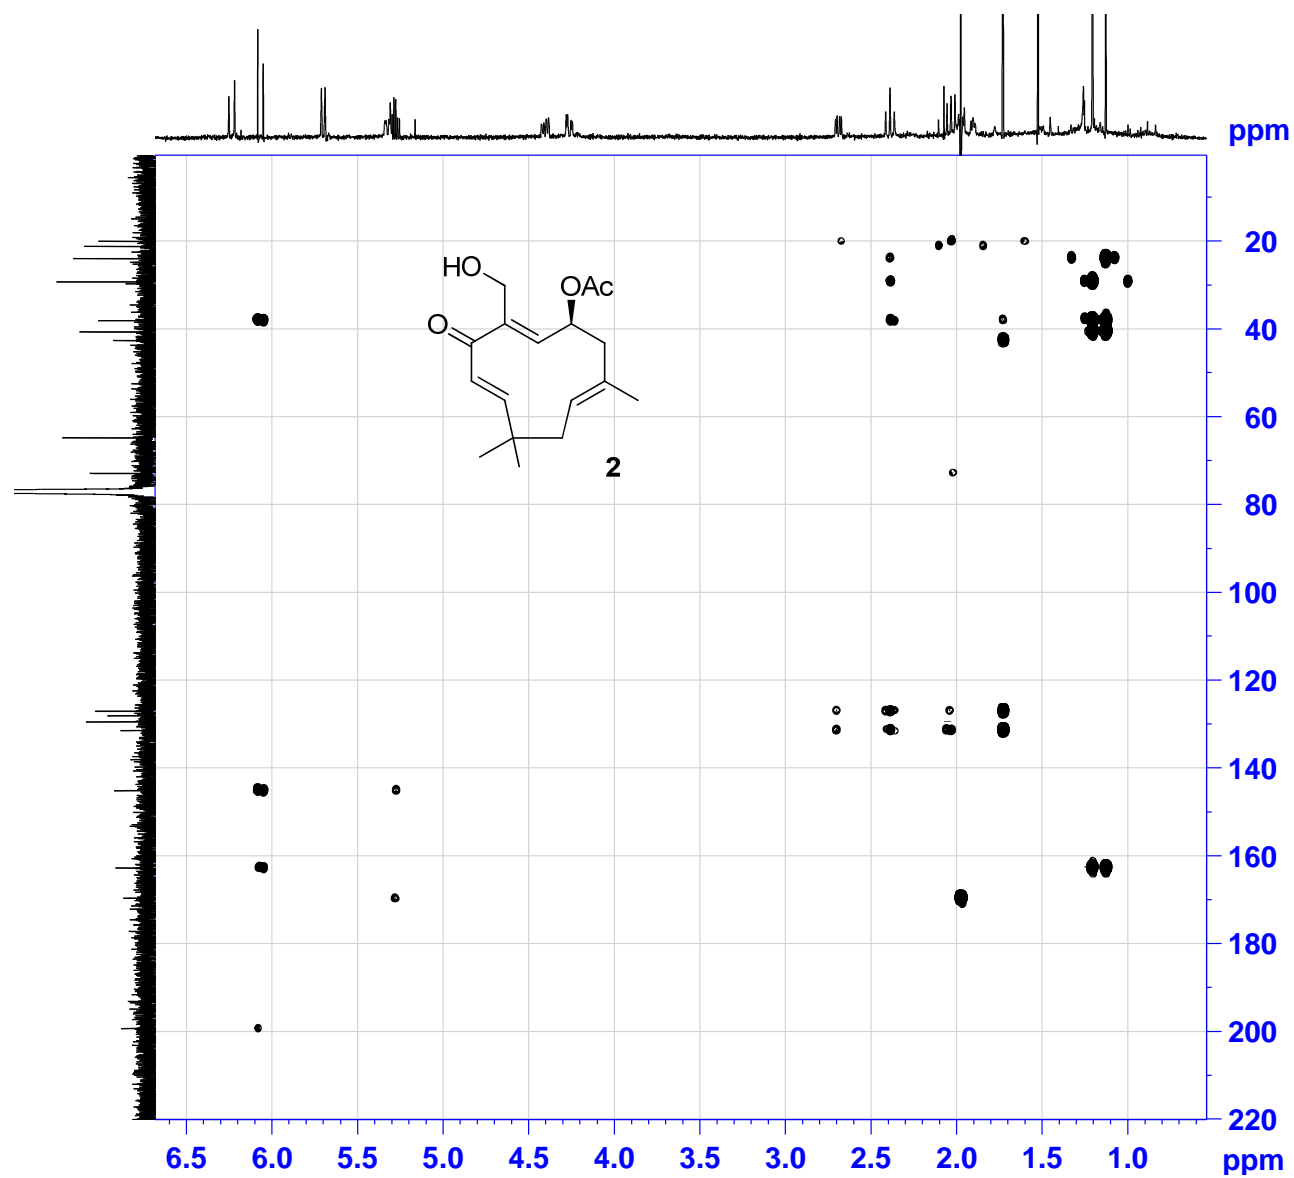



Figure S14. ROESY spectrum of leptogorgin B (2) in CDCl<sub>3</sub>.

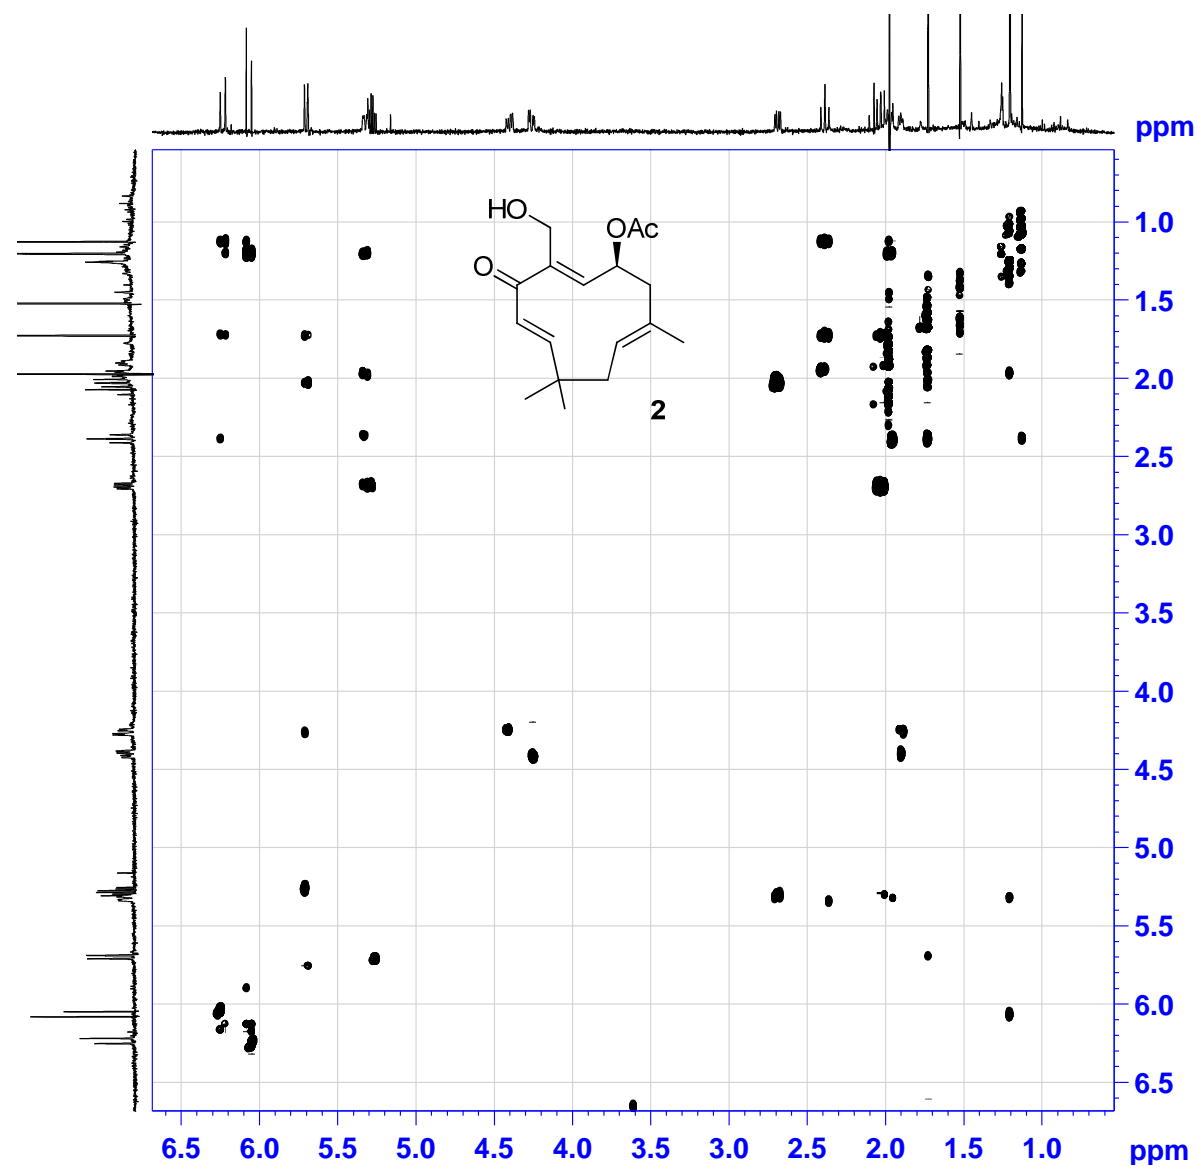

**Figure S15.** HRESIMS of leptogorgin C (**3**).

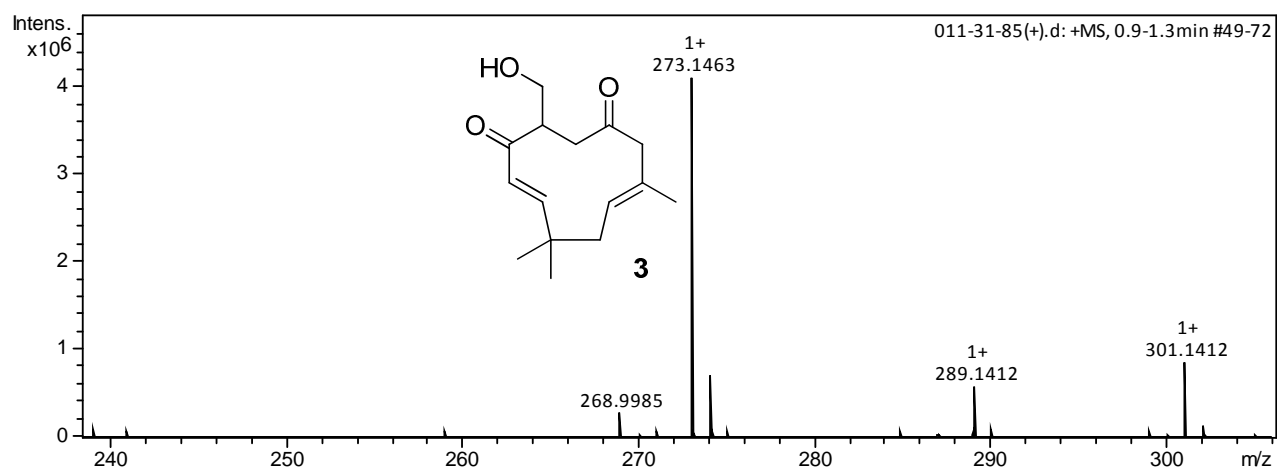

Figure S16.  $^1\text{H}$ -NMR spectrum of leptogorgin C (**3**) in  $\text{CDCl}_3$ .

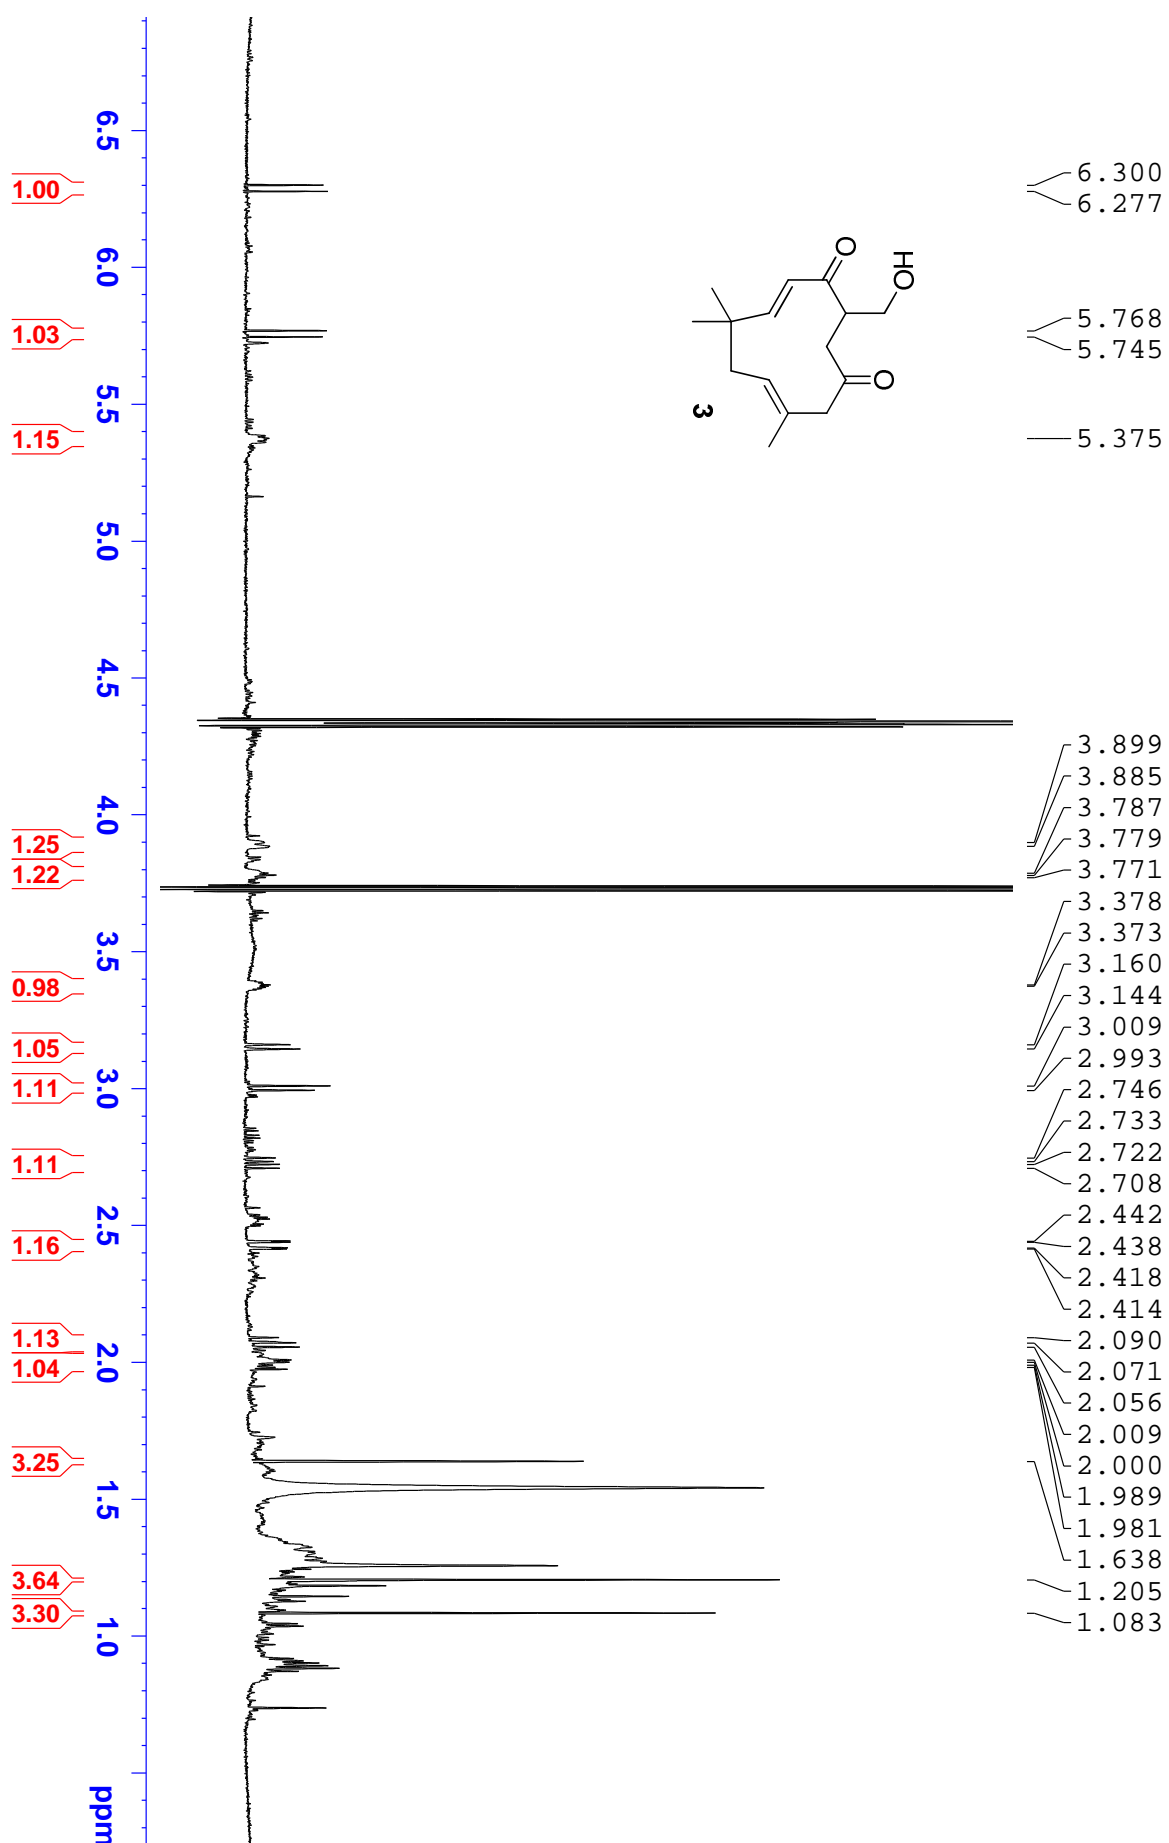

**Figure S17.**  $^{13}\text{C}$ -NMR spectrum of leptogorgin C (**3**) in  $\text{CDCl}_3$ .

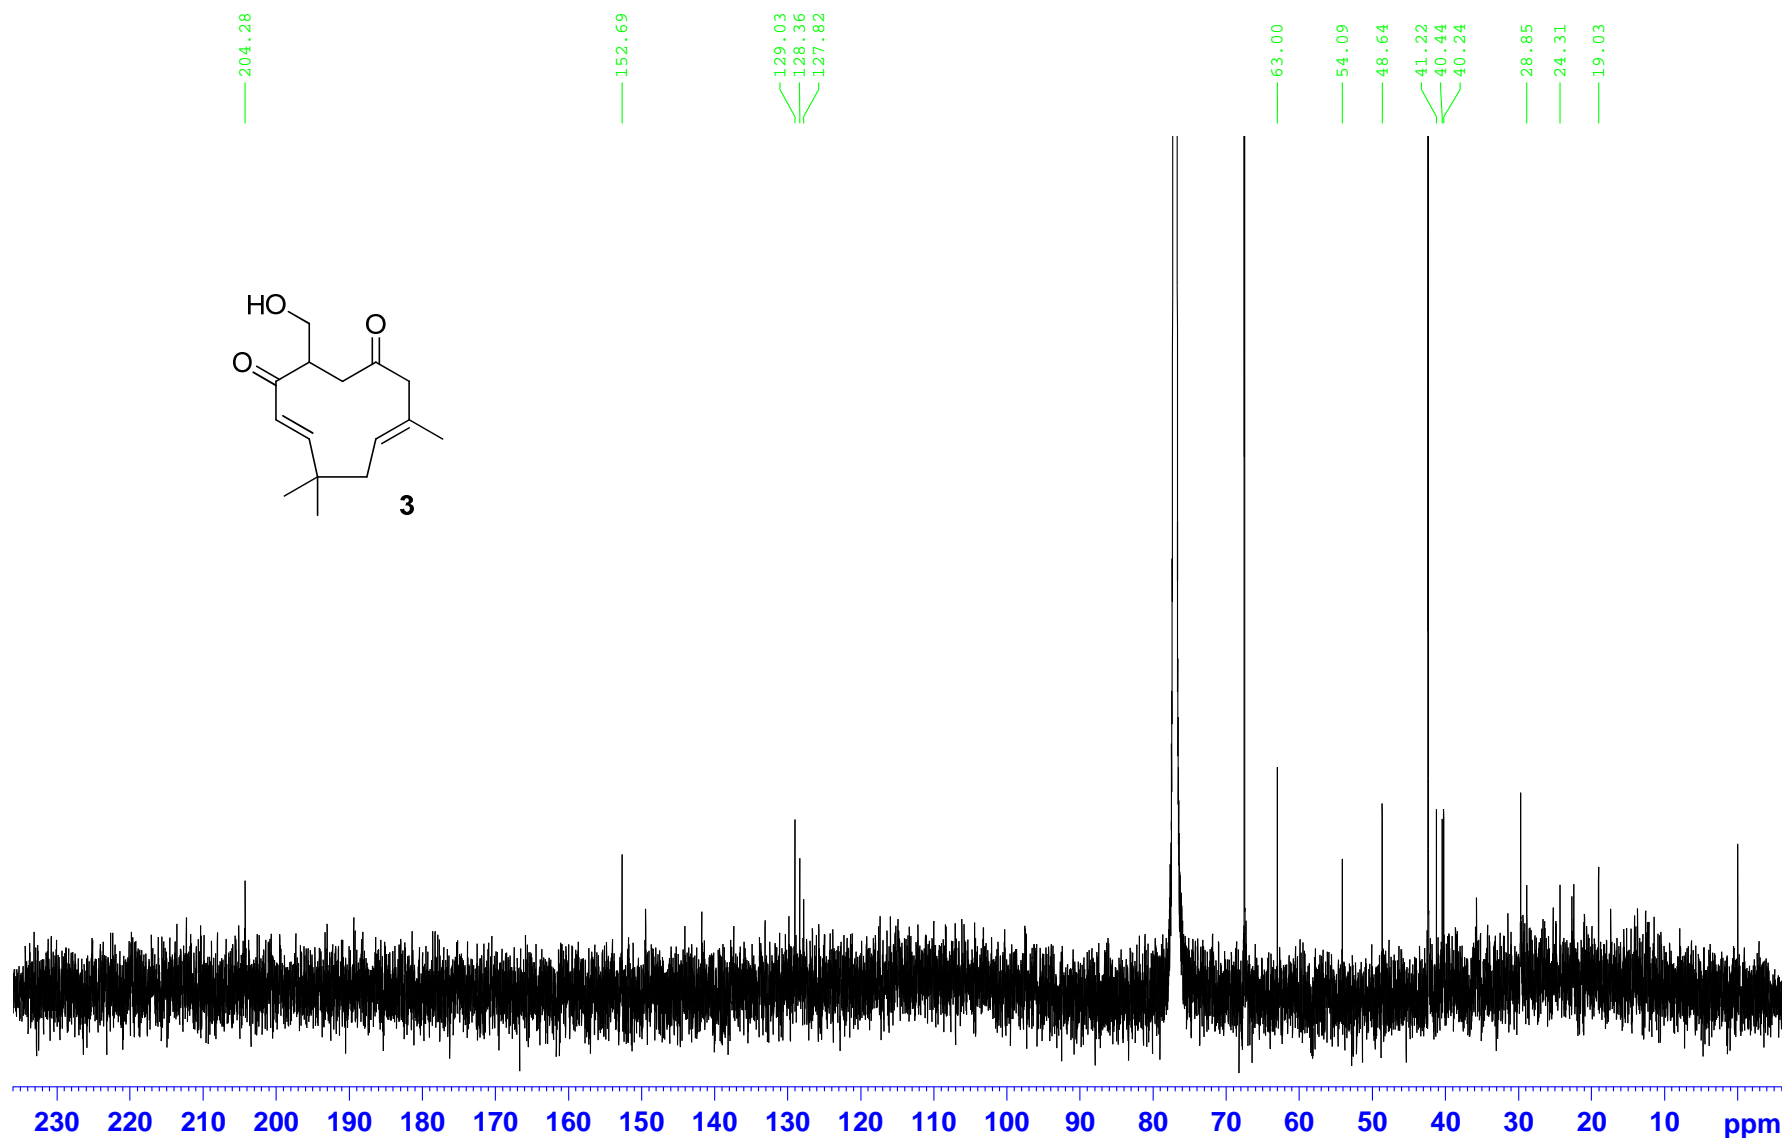

Figure S18.  $^1\text{H}$ - $^1\text{H}$ -COSY spectrum of leptogorgin C (3) in  $\text{CDCl}_3$ .

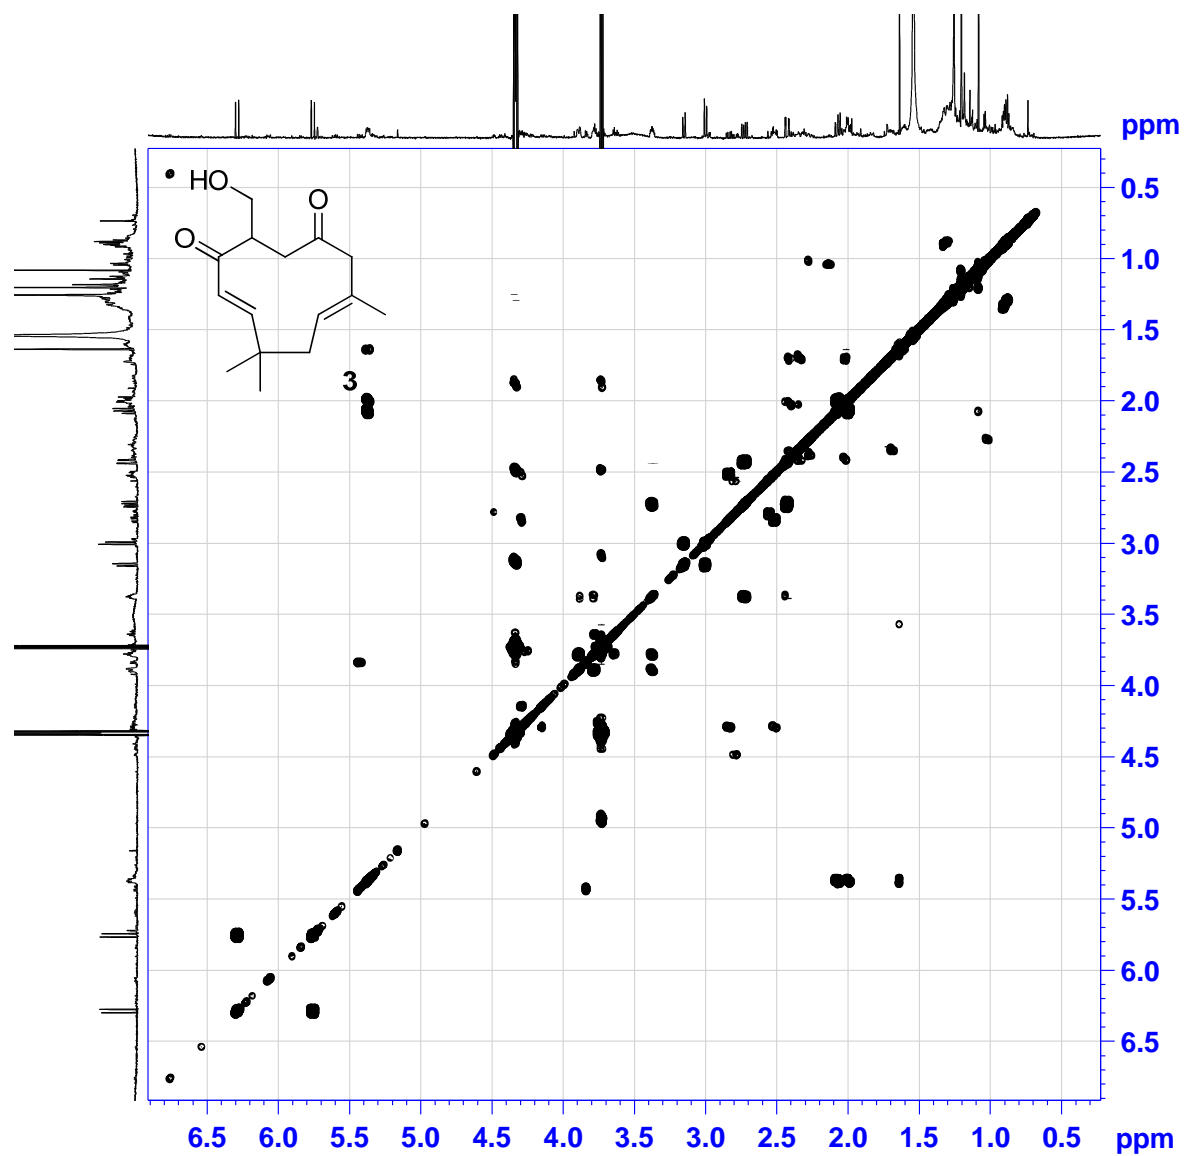

Figure S19. HSQC spectrum of leptogorgin C (3) in CDCl<sub>3</sub>.

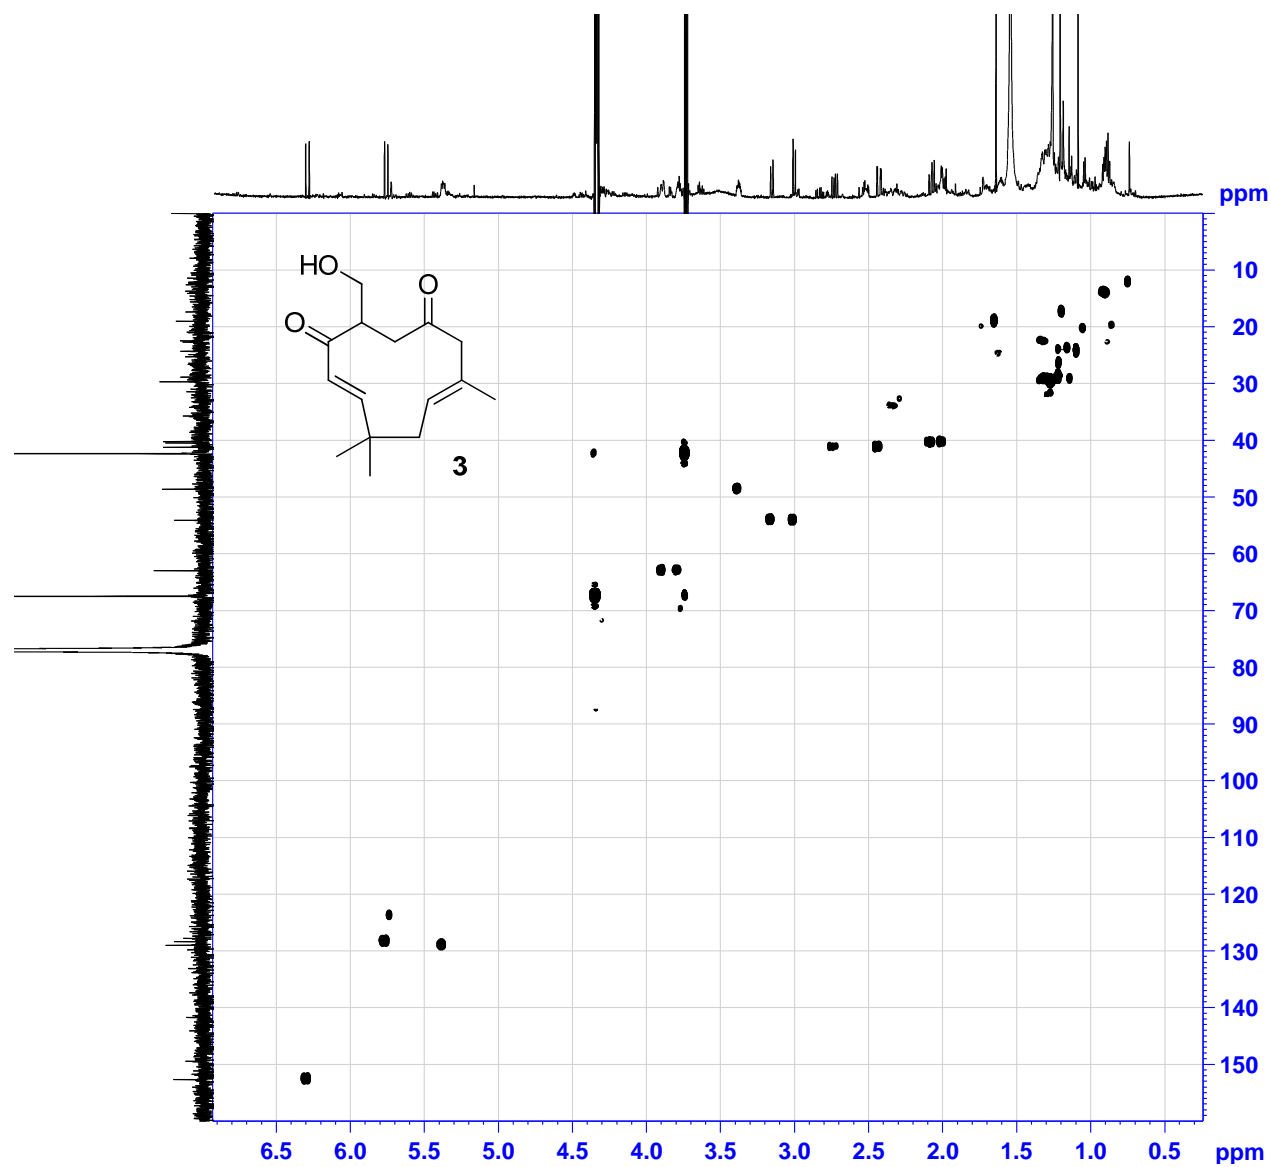

Figure S20. HMBC spectrum of leptogorgin C (3) in CDCl<sub>3</sub>.

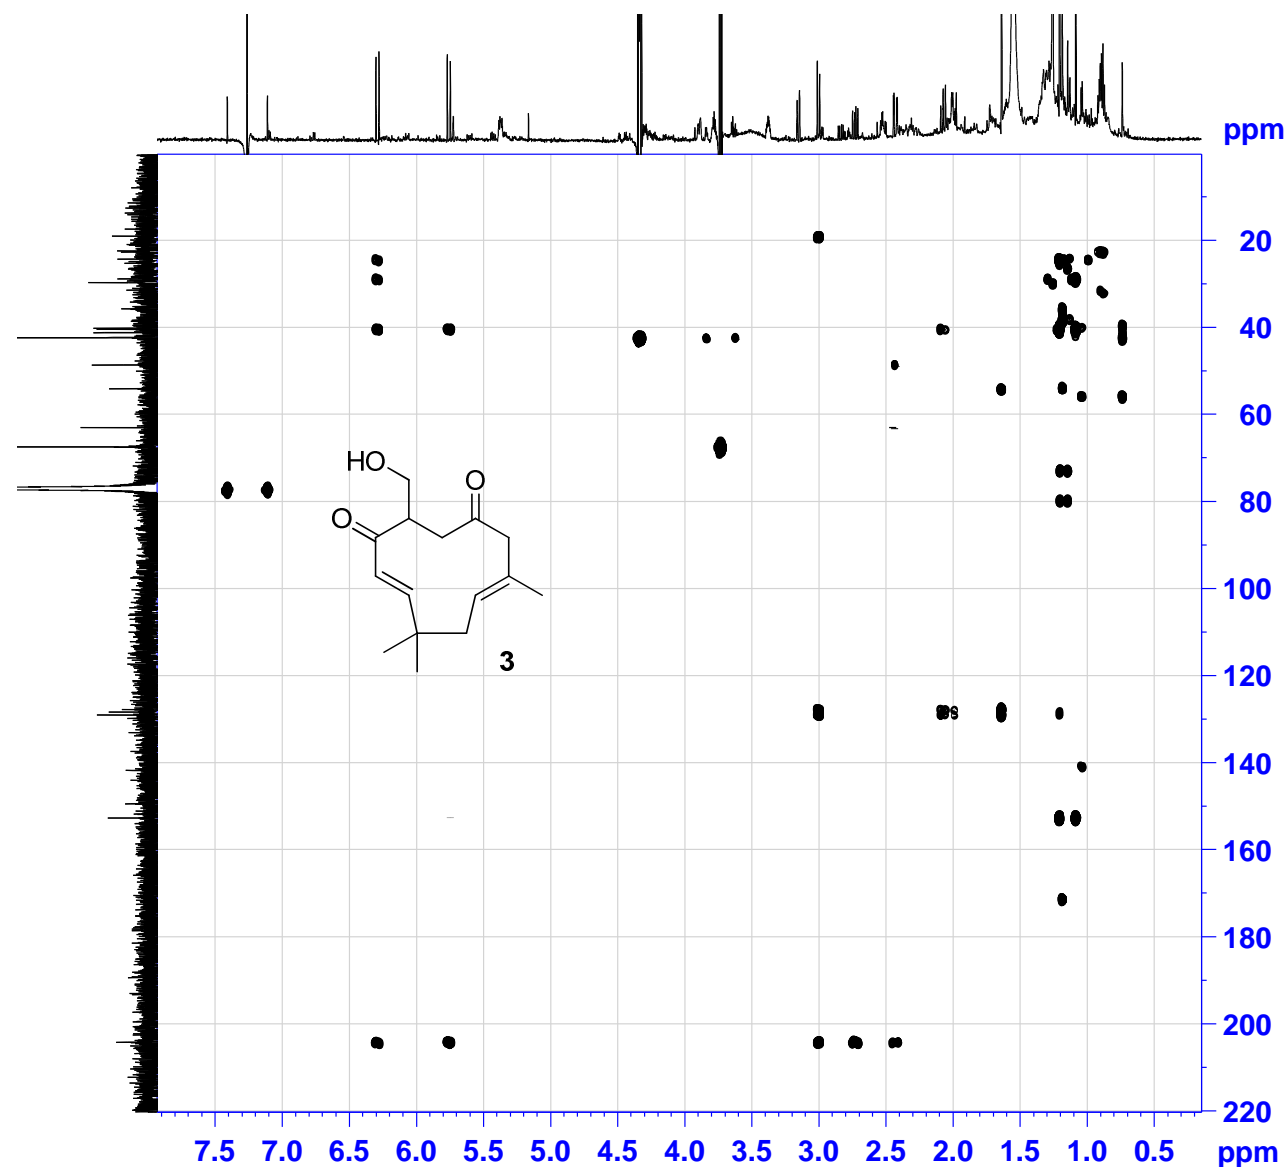

**Figure S21.** HRESIMS of leptogorgoid A (**4**).

Positive mode

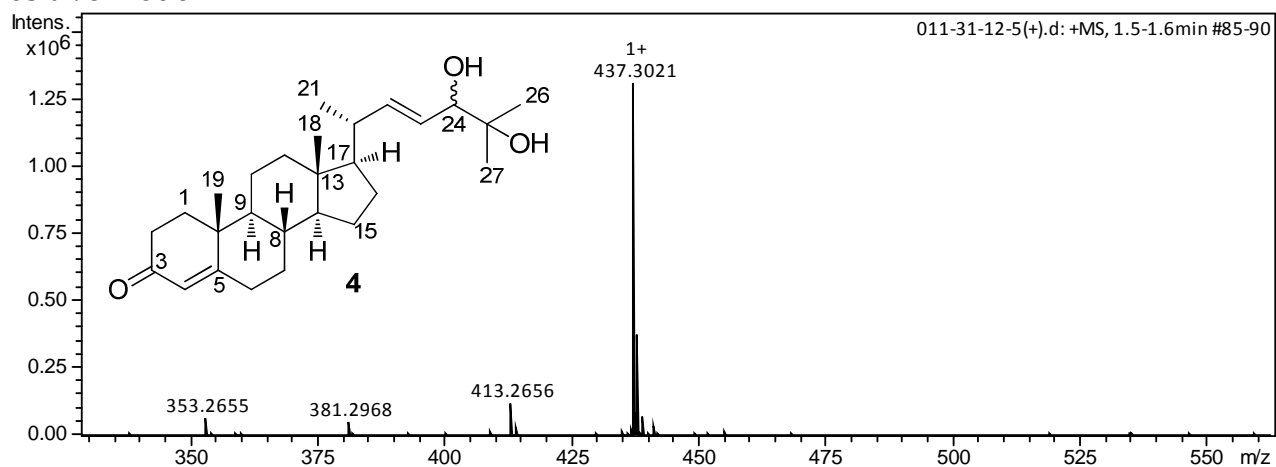

Negative mode

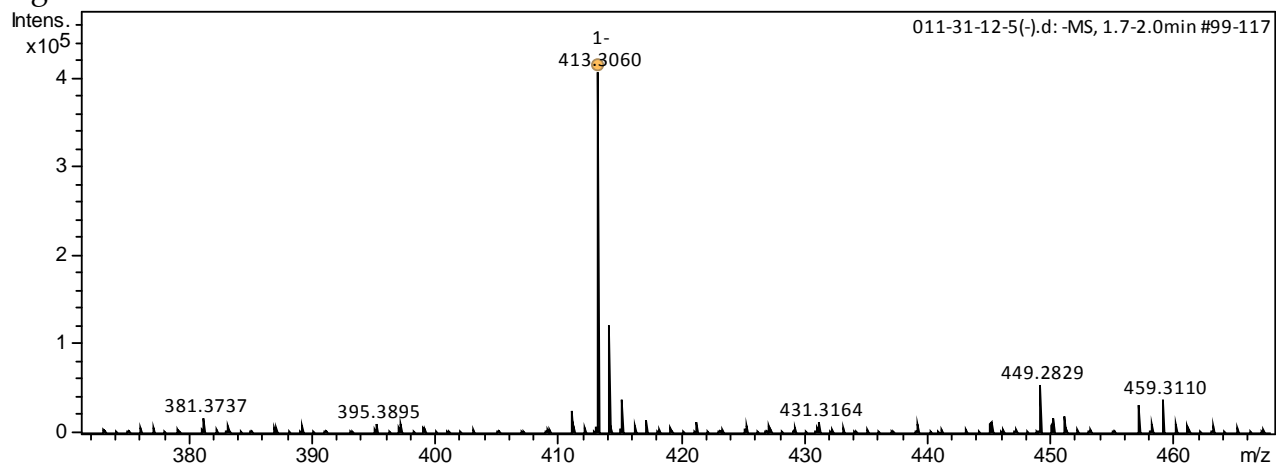



Figure S22.  $^1\text{H}$ -NMR spectrum of leptogorgoid A (4) in  $\text{CDCl}_3$ .

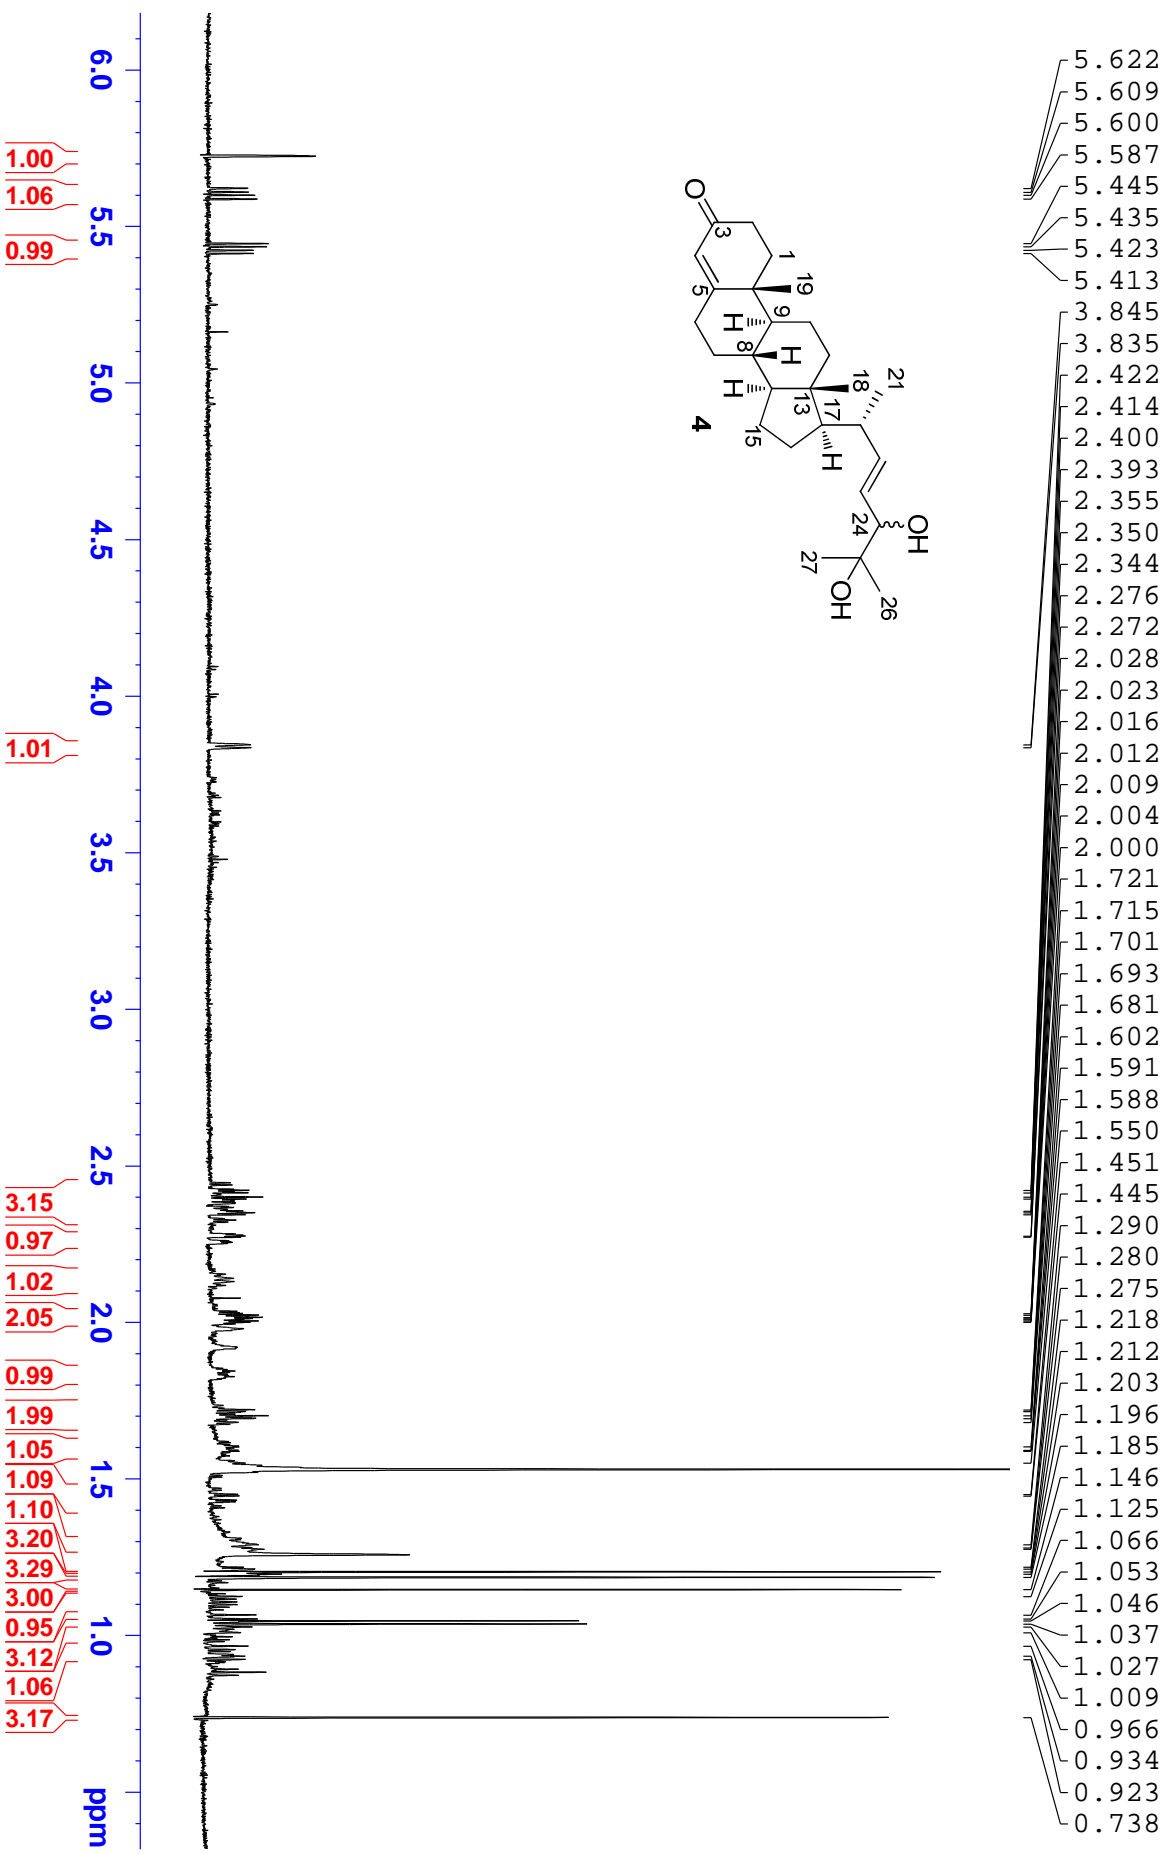

Figure S23.  $^{13}\text{C}$ -NMR spectrum of leptogorgoid A (**4**) in  $\text{CDCl}_3$ .

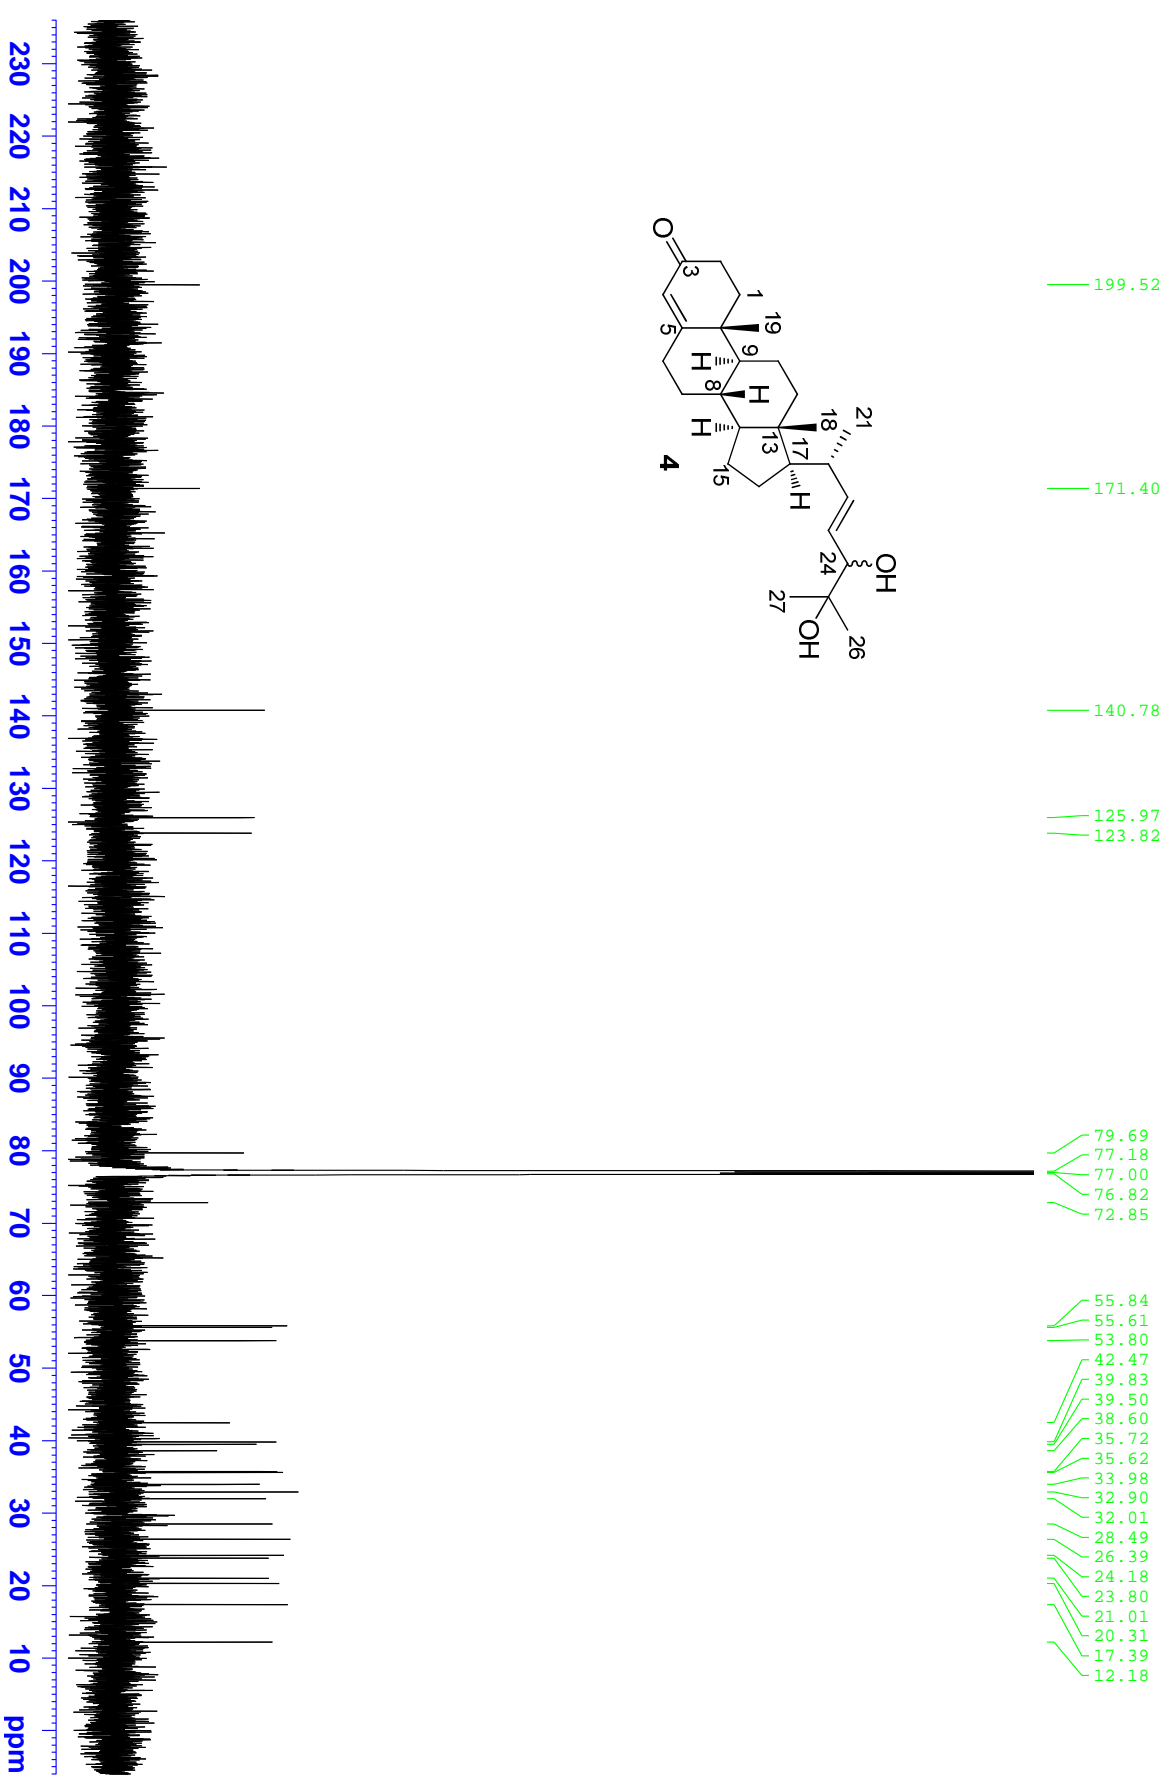

**Figure S24.**  $^1\text{H}$ - $^1\text{H}$ -COSY spectrum of leptogorgoid A (**4**) in  $\text{CDCl}_3$ .

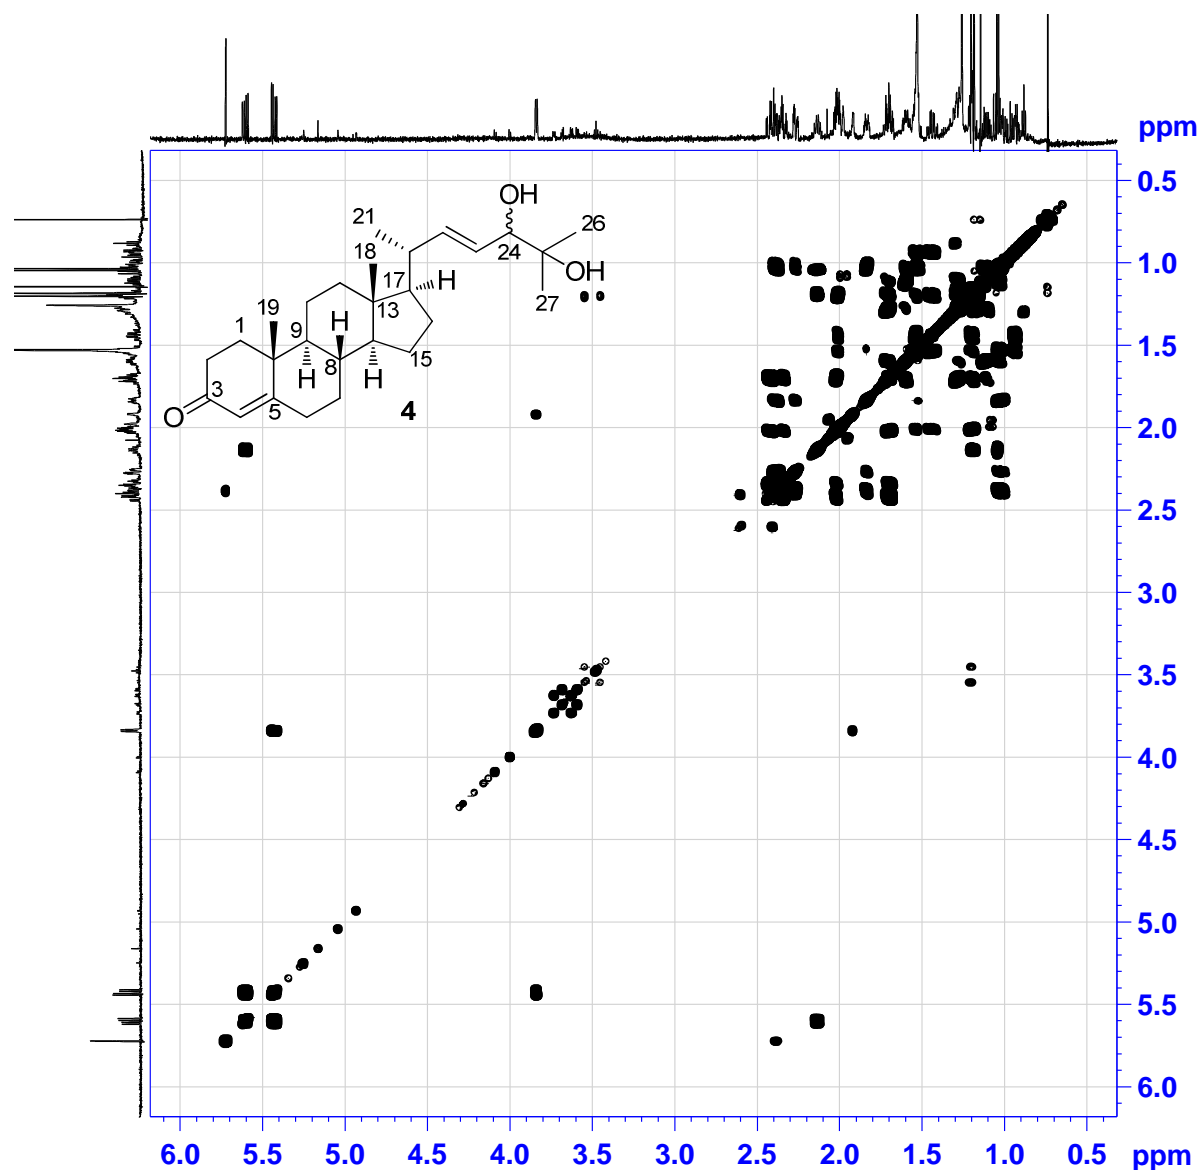

Figure S25. HSQC spectrum of leptogorgoid A (4) in CDCl<sub>3</sub>.

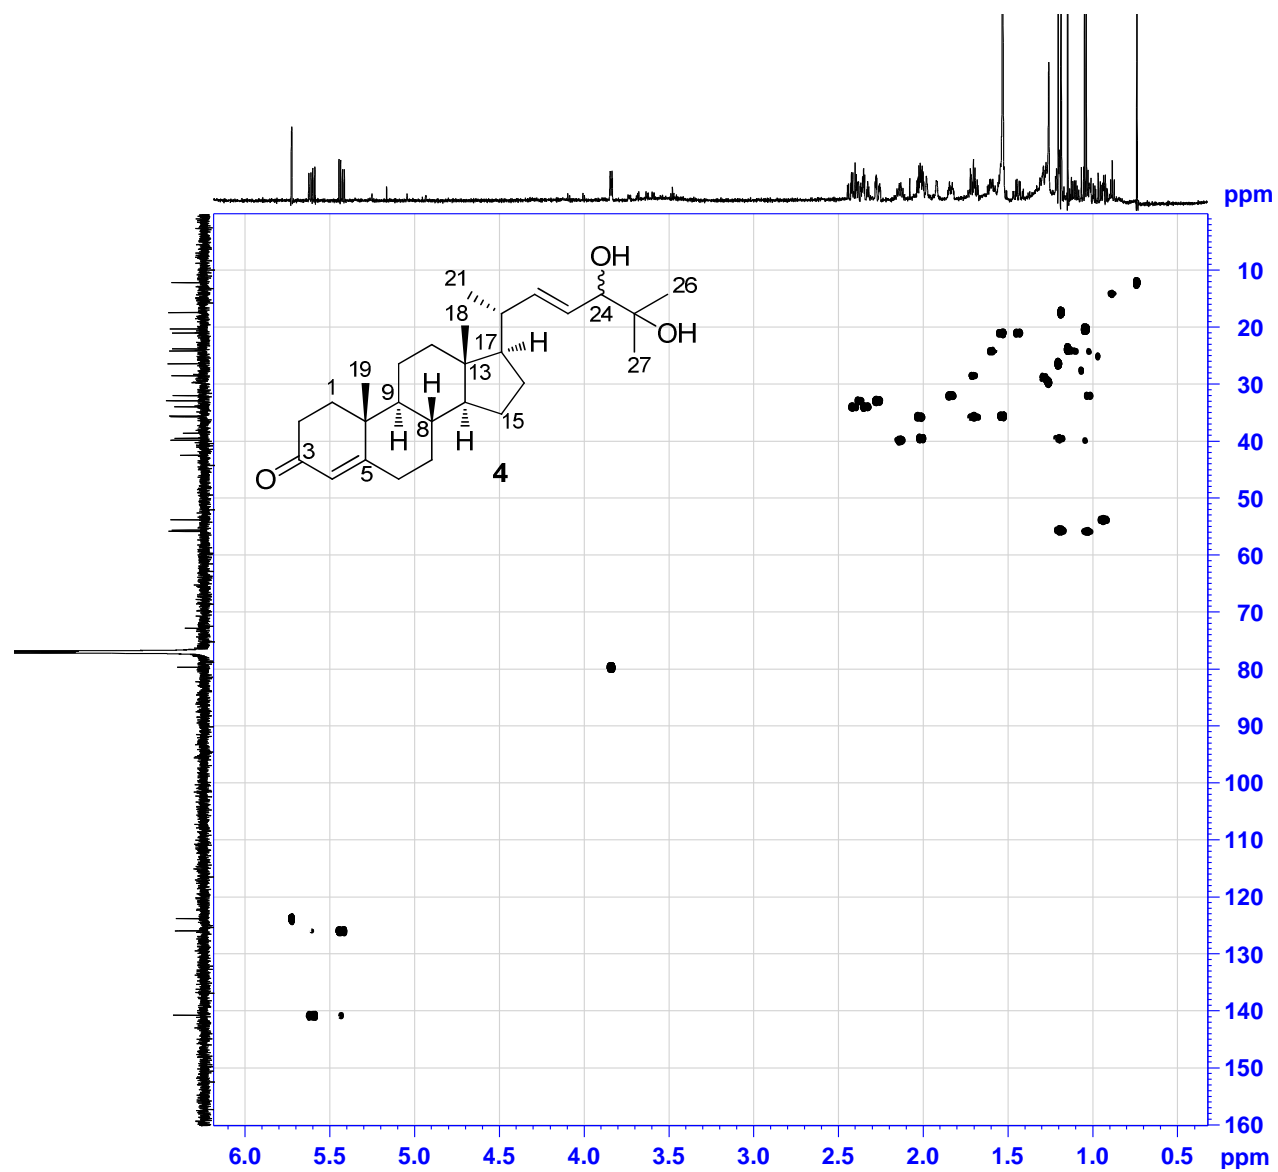

Figure S26. HMBC spectrum of leptogorgoid A (**4**) in CDCl<sub>3</sub>.

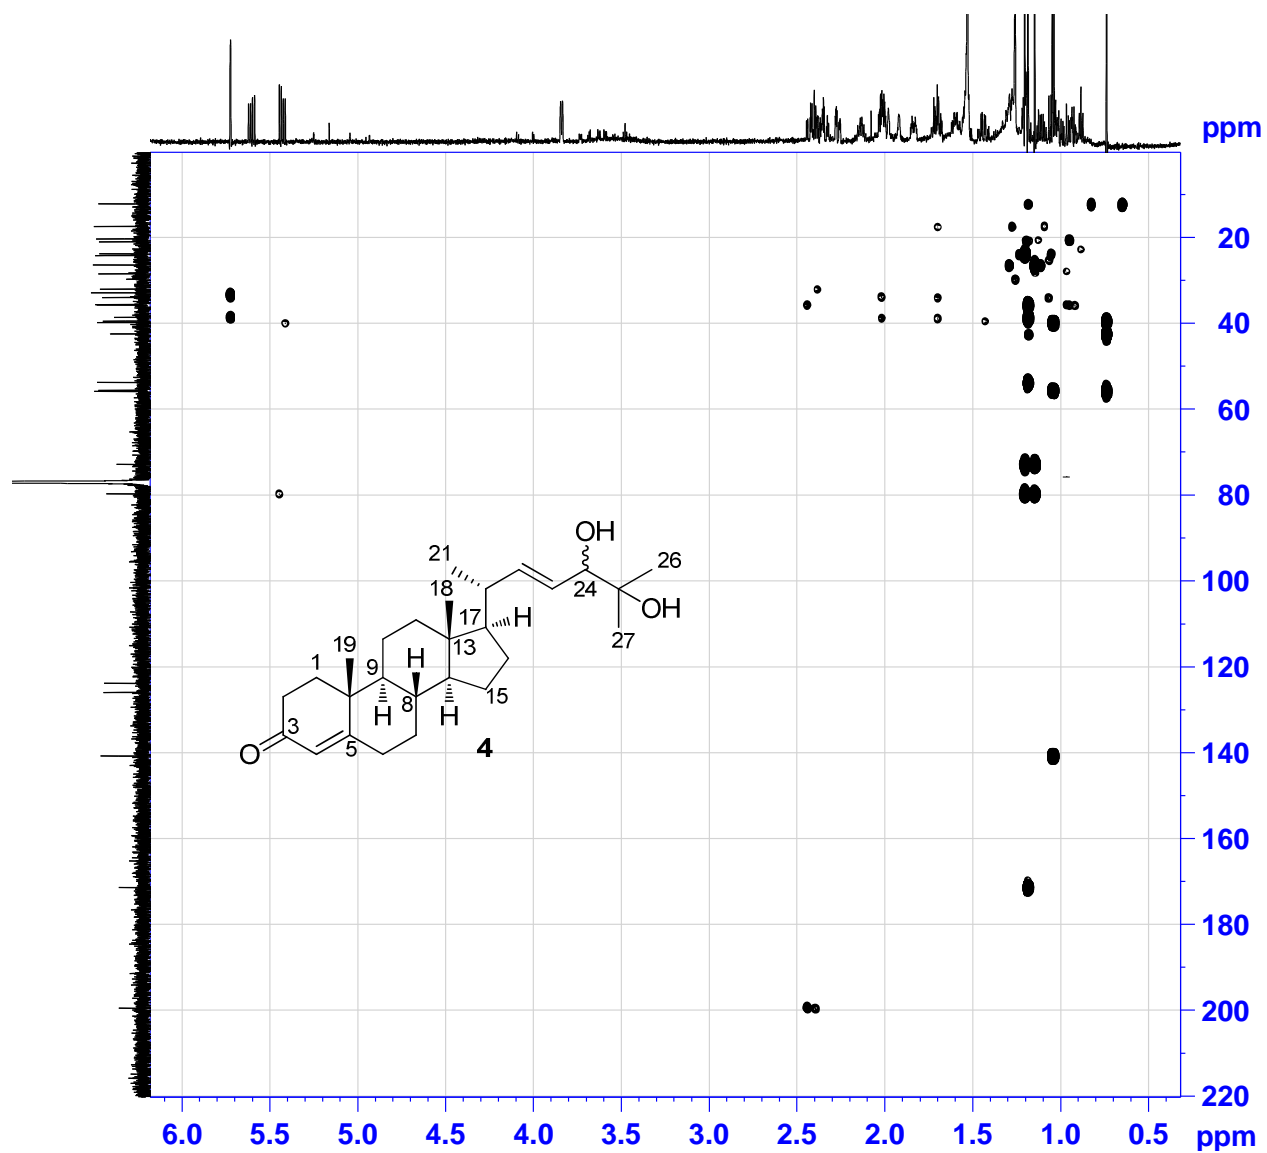

**Figure S27.** ECD spectra of leptogorgin A (**1**) and leptogorgin B (**2**).

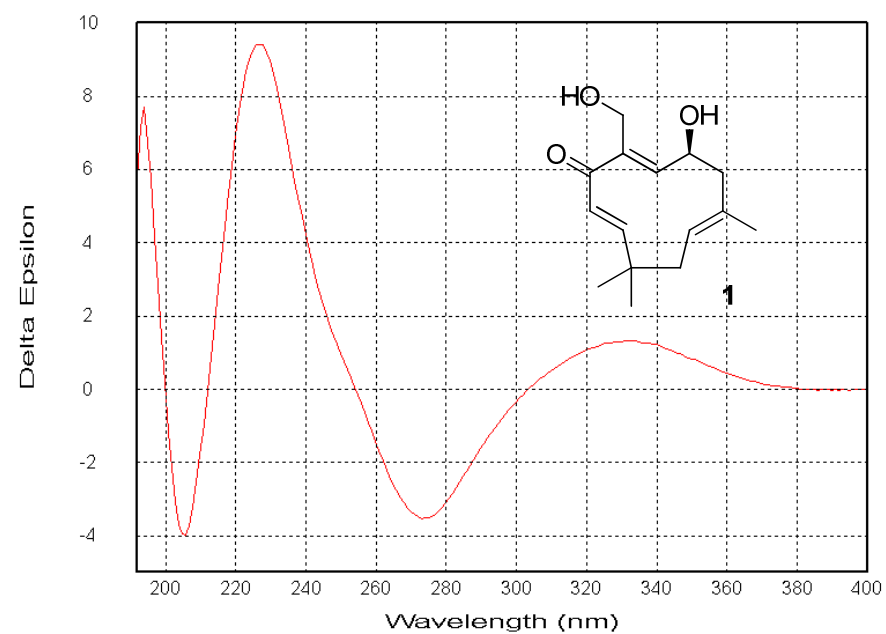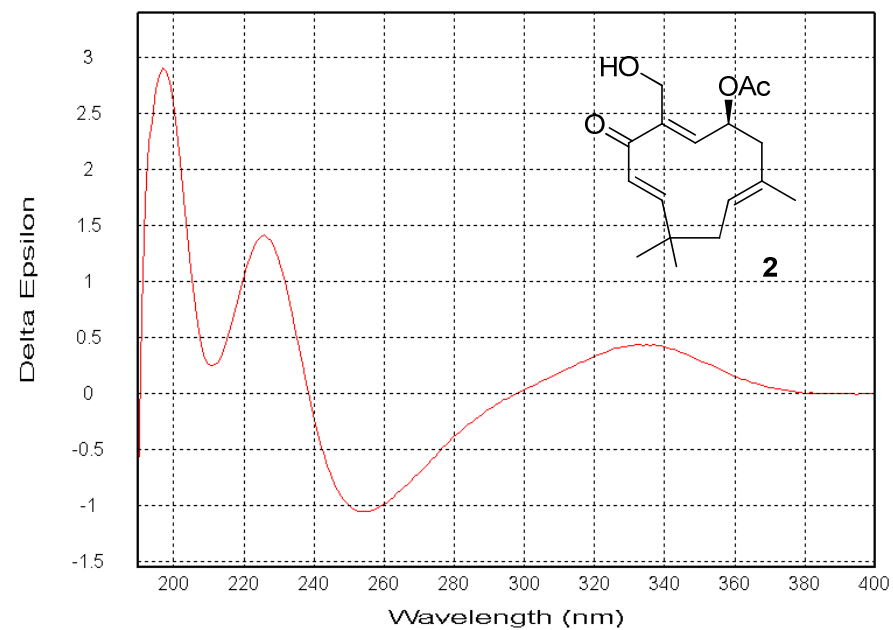

Supplement: s1 [file s1]
